# p38 mitogen-activated protein kinase is required for TGF $\beta$ -mediated fibroblastic transdifferentiation and cell migration

Andrei V. Bakin<sup>1</sup>, Cammie Rinehart<sup>1</sup>, Anne K. Tomlinson<sup>1</sup> and Carlos L. Arteaga<sup>1,2,3,\*</sup>

<sup>1</sup>Departments of Medicine and <sup>2</sup>Cancer Biology, and <sup>3</sup>Vanderbilt-Ingram Cancer Center, Vanderbilt University School of Medicine, 777 Preston Research Building, Nashville, TN 37232, USA

\*Author for correspondence (e-mail: carlos.arteaga@mcm.vanderbilt.edu)

Accepted 23 April 2002

Journal of Cell Science 115, 3193-3206 (2002) © The Company of Biologists Ltd

## Summary

Transforming growth factor  $\beta$  (TGF $\beta$ ) contributes to tumor progression by inducing an epithelial to mesenchymal transdifferentiation (EMT) and cell migration. We found that TGF $\beta$ -induced EMT was blocked by inhibiting activation of p38 mitogen-activated protein kinase (MAPK) with H-7, a protein kinase C inhibitor, and with SB202190, a direct inhibitor of p38MAPK. Inhibition of the p38MAPK pathway affected TGF $\beta$ -mediated phosphorylation of ATF2, but did not inhibit phosphorylation of Smad2. SB202190 impaired TGF $\beta$ -mediated changes in cell shape and reorganization of the actin cytoskeleton. Forced expression of dominant-negative (DN) MAPK kinase 3 (MKK3) inhibited TGF $\beta$ -mediated activation of p38MAPK and EMT. Expression of DN-p38 $\alpha$  impaired TGF $\beta$ -induced EMT. Inhibition of p38MAPK blocked TGF $\beta$ -induced migration of non-tumor and tumor

mammary epithelial cells. TGF $\beta$  induced activation of the p38MAPK pathway within 15 minutes. Expression of TGF $\beta$  type II (T $\beta$ RII) and type I (T $\beta$ RI/Alk5) kinase-inactive receptors blocked EMT and activation of p38MAPK, whereas expression of constitutively active Alk5-T204D resulted in EMT and phosphorylation of MKK3/6 and p38MAPK. Finally, dominant-negative Rac1N17 blocked TGF $\beta$ -induced activation of the p38MAPK pathway and EMT, suggesting that Rac1 mediates activation of the p38MAPK pathway. These studies suggest that the p38MAPK pathway is required for TGF $\beta$ -mediated EMT and cell migration.

Key words: p38MAPK, TGF $\beta$ , Epithelial-mesenchymal transition, Cell migration, Rac1

## Introduction

The transforming growth factor  $\beta$  (TGF $\beta$ ) family of secreted factors regulates various biological processes, including cell proliferation, differentiation and apoptosis (Massague, 1998). TGF $\beta$ s signal through cell-surface serine-threonine kinase type II and type I receptors. TGF $\beta$  binding to TGF $\beta$  type II (T $\beta$ RII) receptor triggers its association with the TGF $\beta$  type I (T $\beta$ RI) receptor (Massague, 1998). T $\beta$ RII phosphorylates and activates T $\beta$ RI, which, in turn, phosphorylates receptor-associated (RA) Smads (Smad2 and Smad3). RA-Smads bind Smad4 and translocate to the nucleus where they regulate transcription of target genes (Massague, 1998). In addition to Smads, TGF $\beta$  can activate Jun N-terminal kinase (JNK) (Atfi et al., 1997; Engel et al., 1999; Frey and Mulder, 1997), extracellular signal-regulated kinase (ERK) (Hartsough and Mulder, 1995), p38 mitogen-activated protein kinase (p38MAPK) (Hanafusa et al., 1999), and Akt (Bakin et al., 2000).

Smad-dependent signaling has been shown to be required for the antiproliferative activity of TGF $\beta$ , and components of this pathway are frequently mutated or silenced in several human cancers (de Caestecker et al., 2000). Tumors, however, frequently express high levels of TGF $\beta$  and inhibition of TGF $\beta$  signaling has been shown to reduce tumor invasiveness and metastasis (Akhurst and Balmain, 1999; Barrack, 1997; Cui et

al., 1996; Hojo et al., 1999). A number of studies provide evidence that TGF $\beta$  contributes to tumor cell invasion and metastasis by inducing mesenchymal transdifferentiation in epithelial cells (EMT) and stimulating cell migration (Akhurst and Balmain, 1999; Barrack, 1997; Oft et al., 1998). This TGF $\beta$ -mediated fibroblastic transdifferentiation is a complex process associated with alterations in epithelial cell junctions, changes in cell morphology, reorganization of the cell cytoskeleton, expression of fibroblastic markers (fibronectin, vimentin), and enhancement of cell migration (Bakin et al., 2000; Miettinen et al., 1994; Piek et al., 1999b).

The molecular mechanisms of TGF $\beta$ -mediated EMT and cell migration are not entirely understood. Studies with TGF $\beta$  receptors have shown that a truncated TGF $\beta$ /bone morphogenic protein (BMP) type I receptor, Alk2, blocks EMT in mouse NMuMG cells (Miettinen et al., 1994). Adenoviral expression of constitutively active human T $\beta$ RI/Alk5 together with Smad2/3 can induce EMT in these cells (Piek et al., 1999b). Expression of a dominant-negative truncated form of T $\beta$ RII decreases the formation of invasive spindle tumours (Portella et al., 1998). Adenoviral expression of Smad2/3 induced EMT only in the context of expression of constitutively active Alk5 (Piek et al., 1999b). Overexpression of Smad7, an inhibitor of Smad-dependent signaling, or dominant-negative Smad3 did not affect the transdifferentiation, arguing against

involvement of Smads in EMT (Bhowmick et al., 2001a). Inhibition of JNK with curcumin (Bakin et al., 2000) or by expression of dominant-negative JNK mutant (Bhowmick et al., 2001a) did not affect EMT. TGF $\beta$  did not activate the Ras-Raf-ERK1/2 cascade and MEK inhibitors (PD098059 and U0126) did not block EMT in NMuMG cells (Bakin et al., 2000; Piek et al., 1999b). We have recently shown that the phosphatidylinositol 3-kinase (PI3K)-Akt pathway contributes to EMT at the step of tight junction disruption (Bakin et al., 2000). The role of p38MAPK in TGF $\beta$ -mediated EMT has not been studied.

The p38MAPK pathway has been implicated in various biological responses to members of the TGF $\beta$  superfamily including TGF $\beta$ -stimulated migration of smooth muscle cells (Hedges et al., 1999), neuronal differentiation of PC12 cells induced by bone morphogenic protein 2 (BMP-2) (Iwasaki et al., 1999), growth/differentiation factor-5-induced chondrogenesis of ATDC-5 cells (Nakamura et al., 1999), and BMP-mediated cardiomyocyte differentiation (Monzen et al., 1999). Studies in *Drosophila* have shown that p38MAPKs are required for wing morphogenesis downstream of decapentaplegic (Dpp), a homologue of TGF $\beta$  (Adachi-Yamada et al., 1999). The p38MAPK pathway has also been implicated in TGF $\beta$  transcriptional responses (Hanafusa et al., 1999; Kucich et al., 2000; Sano et al., 1999).

The molecular mechanism(s) of TGF $\beta$ -induced activation of p38MAPK signaling are not defined. Mammalian p38MAPKs are activated by distinct upstream dual specificity MAPK kinases (MKK), MKK3 and MKK6 (Tibbles and Woodgett, 1999). TGF $\beta$ -activated kinase 1 (Tak1) phosphorylates MKK3/6 in TGF $\beta$  and BMP signaling (Shibuya et al., 1998; Yamaguchi et al., 1995). In addition, other MKK kinases including p21-activating kinase (PAK1) and mixed-lineage kinase (MLK) have been shown to phosphorylate MAPK kinases (MKK3/6) and induce p38MAPKs (Tibbles et al., 1996; Zhang et al., 1995). p38MAPK downstream targets include MAPK-activated protein kinase-2, mitogen- and stress-activated protein kinase-1 (MSK1), and transcription factors ATF2, CHOP, CREB and MEF2C (Tibbles and Woodgett, 1999). Recent studies have found that p38MAPKs are involved in the control of cell cytoskeleton and cell migration via phosphorylation of paxillin and heat shock protein 27 (HSP27) (Hedges et al., 1999).

In these studies we found that H-7, a protein kinase inhibitor, blocks TGF $\beta$ -induced EMT and activation of the p38MAPK pathway in NMuMG mouse mammary epithelial cells. The specific p38MAPK inhibitors, SB203580 and SB202190, impaired TGF $\beta$ -mediated changes in cell shape, the actin cytoskeleton, and cell migration. H-7 and the p38MAPK inhibitors blocked phosphorylation of ATF2, but did not inhibit TGF $\beta$ -mediated phosphorylation of Smad2. Expression of dominant-negative mutants (DN) of MKK3 or p38 $\alpha$  inhibited TGF $\beta$ -mediated EMT. We also showed that TGF $\beta$  activates the MKK3/6-p38MAPK-ATF2 cascade within 15 minutes and expression of DN-MKK3 blocked TGF $\beta$ -mediated activation of p38MAPK and EMT. Kinase-inactive TGF $\beta$  type II and type I (Alk5) receptors blocked EMT and the activation of p38MAPK. Forced expression of kinase-active Alk5-T204D induced both EMT and phosphorylation of p38MAPK in NMuMG cells. Alk5-T204D-induced EMT was blocked by a p38MAPK inhibitor. Finally, we demonstrated that forced

expression of dominant-negative Rac1N17 blocked TGF $\beta$ -induced activation of the p38MAPK-ATF2 cascade and EMT.

## Materials and Methods

### Antibodies and other reagents

TGF $\beta$ 1 and tumor necrosis factor  $\alpha$  (TNF $\alpha$ ) were obtained from R&D Systems. Antibodies to fibronectin, Rac1 and Smad2 were from Transduction Laboratories; antibodies to ZO-1 were from Chemicon; the monoclonal antibody to p38MAPK and rabbit polyclonal to haemagglutinin (HA) epitope were from Santa Cruz Biotechnology, Phalloidin-FITC, phalloidin-Texas Red, and Hoechst 3342 were from Molecular Probes. The  $\beta$ -tubulin-Cy3 antibody was from Sigma. Antibodies to phospho-Ser473 Akt, total Akt, phospho-MKK3/6, phospho-p38MAPK, and phospho-ATF2 were from New England Biolabs, and to C-terminal phospho-Smad2 from Upstate Biotechnology. LY294002, H-7, SB203580, and SB202190 were from Calbiochem. GDP and GTP $\gamma$ S were purchased from Sigma. The GST-ATF2 fusion protein was from New England Biolabs. TBS buffer contained 20 mM Tris-HCl, pH 7.6, 150 mM NaCl. TBST was TBS supplemented with 0.1% Tween 20 (v/v).

### Cell culture

NMuMG mouse mammary epithelial cells, SiHa human cervical carcinoma cells, MDA-MB-231 human breast cancer cells and HEK293T human kidney cells were purchased from American Tissue Culture Collection (ATCC). Cells were cultured as recommended by ATCC. 4T1 tumor cells were provided by F. Miller (Karmanos Cancer Center, Detroit, MI) and cultured in 10% FBS-DMEM.

### Plasmids and retroviral constructs

The retroviral vectors pGabe and pGabe-T $\beta$ RII-K277R were provided by Martin Oft (UCSF, San Francisco, CA) and have been described previously (Oft et al., 1998). The T $\beta$ RII-K277R construct contains an HA-tag at the N-terminus. Human wild-type Alk5, dominant-negative Alk5-K232R, and constitutively active Alk5-T204D constructs were provided by Masahiro Kawabata (The Cancer Institute, Tokyo, Japan). To generate pBMN-Alk5 constructs, the *EcoRI/SalI* fragments of Alk5 and Alk5-K232R including the C-terminal HA-tag were cloned in the retroviral pBMN-IRES-EGFP vector provided by Garry Nolan (Stanford University). The pBMN-Rac1N17 was engineered by cloning a *BamHI-XhoI* fragment encoding Rac1N17 from pCDNA3-Rac1N17 (a gift of Richard Cerione, Cornell University, Ithaca, NY) at the *BamHI-SalI* site of the retroviral pBMN-IRES-GFP vector. RhoAN19 and RhoAQ63L were previously described (Bakin et al., 2000). The pBMN-MKK3AL and pBMN-MKK6AL plasmids were generated by cloning *SalI-NotI* fragment of MKK6AL or *XhoI-NotI* fragment of MKK3AL from pCDNA3 vector into the retroviral pBMN-IRES-GFP vector. pCDNA3-MKK3AL and pCDNA3-MKK6AL plasmids were a gift of James Woodgett (The Ontario Cancer Institute, Toronto, Ontario). pBMN-p38AGF encoding a dominant-negative mutant of p38 $\alpha$  and containing N-terminal Flag epitope was generated by cloning a *HindIII-XbaI* fragment of p38AGF from pCDNA3-p38AGF at the *XhoI* site of pBMN-IRES-GFP. pCDNA3-p38AGF was a gift of Roger Davies (University of Massachusetts, Worcester, MA). Plasmids pHCMV-VSVG, encoding vesicular stomatitis virus glycoprotein (VSV-G), and pCMVgag-pol, containing the Moloney murine leukemia virus (MoMLV) gag and pol genes, were provided by Jane Burns (University of California at San Diego).

### Retroviral infection of cells

Retroviruses were prepared by transfection of HEK293T cells with 15

$\mu$ g DNA/100 mm dish of three plasmids encoding gag/pol, VSV-G, and the target construct, ratio 4:3:8. Supernatants from cells were collected for 3 days and combined, filtered through 0.4  $\mu$ m filters, and stored in aliquots at  $-80^{\circ}\text{C}$ . NMuMG cells were infected with supernatant containing retroviruses in the presence of 6  $\mu$ g/ml Polybrene (Sigma) as described previously (Yee et al., 1994). Three days later, GFP-positive cells were selected by flow cytometry. Under these conditions more than 95% of selected cells expressed GFP at the time of experiments.

**Immunoblot analysis**

Cells were incubated in serum-free medium for 4 hours prior to treatment with TGF $\beta$ 1. Cells were lysed in buffer containing 20 mM Tris, pH 7.4, 137 mM NaCl, 1% NP-40, 10% glycerol, 20 mM NaF, 1 mM Na orthovanadate, 1 mM PMSF, 2  $\mu$ g/ml aprotinin, and 2  $\mu$ g/ml leupeptin. Protein concentrations in cell lysates were determined by the Bradford method. Protein extracts (50  $\mu$ g/lane) were separated by 12.5% SDS-PAGE and transferred to nitrocellulose membranes (100

mA, 2.5 hours). Membranes were blocked with 5% milk in TBST for 1 hour at room temperature (RT) and then incubated with primary antibodies in TBST plus 1% milk for 16 hours at  $4^{\circ}\text{C}$ , followed by incubation with secondary antibodies for 1 hour at RT. Membranes were washed three times in TBST and immunoreactive bands visualized by ECL (Pierce).

**p38MAPK in vitro kinase assay**

p38MAPK was precipitated from protein extracts (200  $\mu$ g) with a p38MAPK monoclonal antibody (Santa Cruz Biotechnology) for 2 hours at  $4^{\circ}\text{C}$ . An in vitro kinase reaction was performed in a 40- $\mu$ l volume by adding to the immune complexes 1  $\mu$ g GST-ATF2 and 10  $\mu$ Ci [ $\gamma$ - $^{32}\text{P}$ ]ATP (specific activity 3000 Ci/mmol, New England Nuclear) for 20 minutes at  $30^{\circ}\text{C}$  in the presence of 10  $\mu$ M PKA peptide inhibitor (Calbiochem). Reactions were terminated by the addition of Laemmli loading buffer and heating, followed by 15% SDS-PAGE and transfer to nitrocellulose (NC) membranes. Quantitative analysis of [ $\gamma$ - $^{32}\text{P}$ ]-labeled bands was performed using a

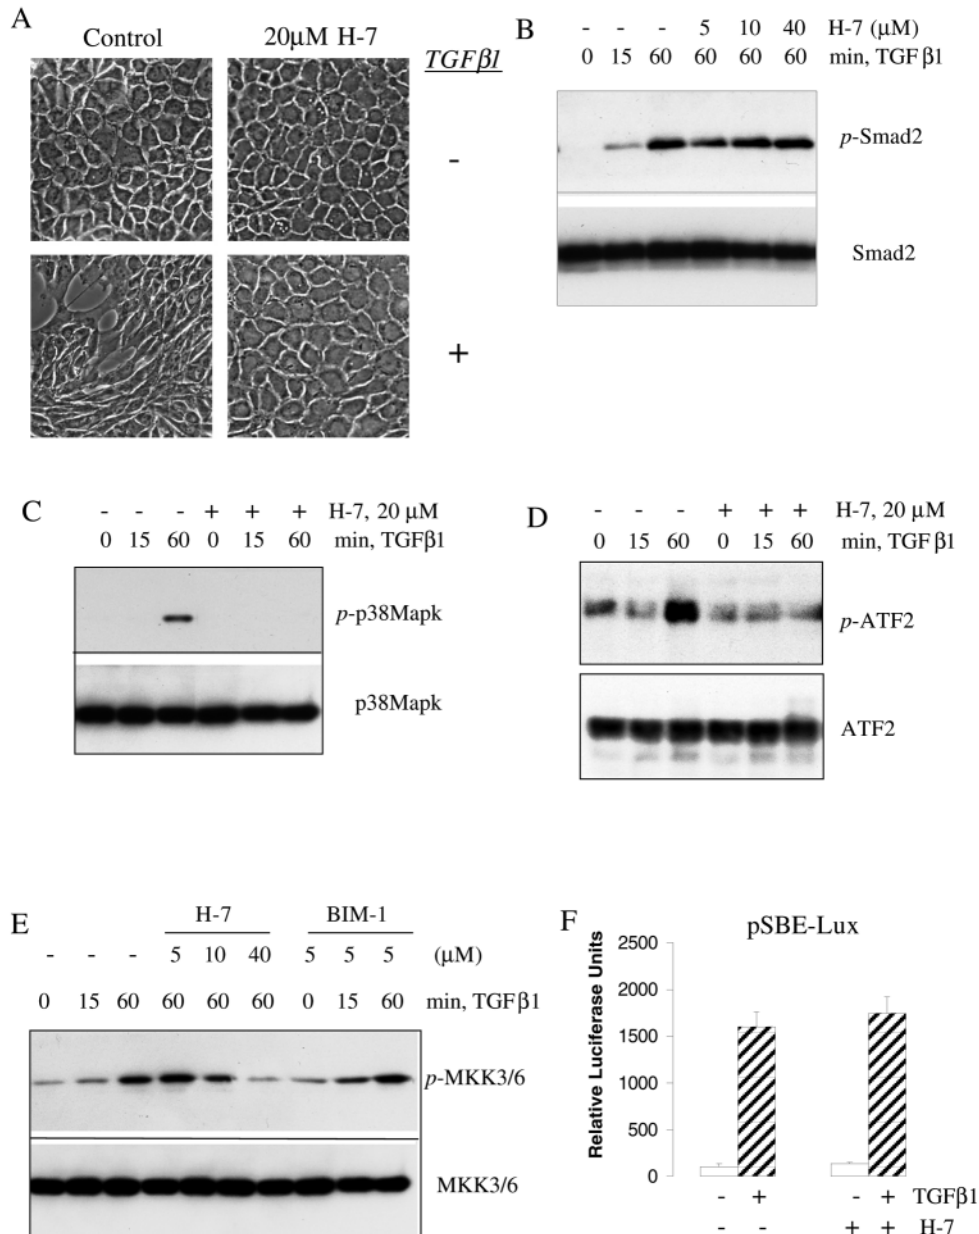

**Fig. 1.** Inhibition of TGF $\beta$ -mediated EMT and p38MAPK activation by H-7 kinase inhibitor. (A) NMuMG mammary epithelial cells were grown on glass coverslips for 24 hours and treated (bottom row) or not (top row) with 2 ng/ml TGF $\beta$ 1 for 24 hours. Where indicated, cells were co-incubated with 20  $\mu$ M H-7. Phase contrast images were taken at 200 $\times$  magnification. (B-E) Immunoblot analysis of whole-cell extracts from NMuMG cells treated with 2 ng/ml TGF $\beta$ 1 for the indicated times. Kinase inhibitors were added 60 minutes before TGF $\beta$  treatment. (B) Immunoblot detection of phospho-Smad2 and total Smad2. (C) Detection of phospho-p38MAPK total p38MAPK. (D) Inhibition of TGF $\beta$ -induced ATF2 phosphorylation by H-7. Immunoblots with antisera to phospho-ATF2 and total ATF2. (E) TGF $\beta$ -induced phosphorylation of MKK3/6 in cells co-treated with various concentrations of H-7 or 5  $\mu$ M BIM-I, a PKC inhibitor. (F) Luciferase activity in NMuMG transfected with Smad-dependent reporter pSBE-Lux and pCMV-R1 vectors and treated with 1 ng/ml TGF $\beta$ 1 for 16 hours in the absence or presence of 20  $\mu$ M H-7. Each bar represents the mean $\pm$ s.d. of three wells.



PhosphorImager (Molecular Dynamics). The same NC-membranes were probed with a monoclonal antibody to p38MAPK.

#### Immunofluorescence microscopy

NMuMG cells ( $10^5$  cells/well) were grown in DMEM containing 5% FBS on glass coverslips (22×22 mm) for 24 hours before treatment with 2 ng/ml TGF $\beta$ 1. Cells were fixed with 4% paraformaldehyde in phosphate-buffered saline (PBS) for 10 minutes at RT and then permeabilized with 0.05% Triton X-100 for 10 minutes. Cells were washed three times in PBS after each treatment. Cells were blocked with 3% milk in PBS for 30 minutes at RT, incubated for 60 minutes with primary antibodies diluted in 1% milk/PBS (1/300 for ZO-1, 1/500 for Smad2, 1/250 for fibronectin), and then with fluorescent secondary antibodies (1/500) for 45 minutes at RT. Microtubules were stained for 30 minutes at RT with  $\beta$ -tubulin-Cy3 diluted 1/250 in 1% milk/PBS. Actin was stained with phalloidin-FITC (4 units/ml) or phalloidin-Texas Red (2 units/ml). Cell nuclei were stained with 1  $\mu$ g/ml Hoechst for 10 minutes at RT. Coverslips were mounted on 25×75 mm microslides (VWR Scientific) using AquaPolyMount (Polysciences). Fluorescent images were captured using a Princeton Instruments cooled CCD digital camera from a Zeiss Axiophot upright microscope.

#### Transcriptional assays

NMuMG cells ( $3 \times 10^4$ ) were seeded in 24-well plates and transfected with 0.16  $\mu$ g/ml pSBE-Lux containing 12 repeats of Smad binding sequence (provided by J.-M. Gauthier, Laboratoire Glaxo Wellcome, Les Ulis Cedex, France) with 0.002  $\mu$ g/ml pCMV-Rl (Promega, Madison, WI) using FuGENE6 reagent (Roche Molecular Biochemicals) according to the manufacturer's protocol. Cells were incubated for 8 hours in 0.5% FBS-DMEM prior to treatment with 1 ng/ml TGF $\beta$ 1 for 16 hours. Firefly luciferase (Luc) and *Renilla reniformis* luciferase (RLuc) activities in cell lysates were determined using the Dual Luciferase Reporter Assay System (Promega) according to the manufacturer's protocol in a Monolight 2010 luminometer (Analytical Luminescence Laboratory, San Diego, CA). Luc activity was normalized to RLuc activity and presented as Relative Luciferase Units. All assays were done in triplicate wells and each experiment was repeated at least twice.

#### Affinity precipitation of Rac using GST-PBD

A fusion protein containing the GTPase-binding domain from human PAK1 (PBD) and glutathione S-transferase (GST) was expressed in *Escherichia coli* using pGEX-4T3-GST-PBD as described (Benard et al., 1999). pGEX-4T3-GST-PBD was kindly provided by Gary Bokoch (Scripps Research Institute). NMuMG cells ( $2 \times 10^7$ /assay) were treated with 2 ng/ml TGF $\beta$ 1 for 15 minutes followed by cell lysis in 20 mM Tris, pH

7.5, 150 mM NaCl, 5 mM MgCl<sub>2</sub>, 1% NP-40, 5% glycerol, 20 mM NaF, 1 mM sodium orthovanadate, 1 mM PMSF, 2  $\mu$ g/ml aprotinin, and 2  $\mu$ g/ml leupeptin in the presence of 8  $\mu$ g GT-PBD. Cell lysates were clarified by low speed centrifugation at 4°C. HEK293T cells transfected with Rac1N17 or Alk5 mutants were lysed in the same buffer. After clarification, cell lysates (350  $\mu$ g/assay) were incubated with 8  $\mu$ g GST-PBD. To prepare cytosolic Rac1 loaded with GDP or GTP $\gamma$ S, cell lysates (equivalent of  $2 \times 10^6$  cells) were incubated for 15 minutes at 30°C in the presence of 10 mM EDTA and 100 mM GTP $\gamma$ S or 1 mM GDP to facilitate nucleotide exchange (Benard et al., 1999). The loading reaction was terminated by addition of 60 mM MgCl<sub>2</sub>. Affinity precipitation was performed using 15  $\mu$ l of glutathione-Sepharose 4B beads (Pharmacia) for 1 hour at 4°C. The bead pellets were washed three times with 20 mM Tris, pH 7.5, 50 mM NaCl, 5 mM MgCl<sub>2</sub>, 1 mM DTT, 1% NP-40 and 2 times in PBS. The bead pellet was finally suspended in 40  $\mu$ l of Laemmli sample buffer. Proteins were separated on 15% SDS-PAGE, transferred to nitrocellulose membrane and immunoblotted with an antibody to Rac1 (Transduction Laboratories).

#### Migration assays

NMuMG or MDA-MB-231 cells ( $1 \times 10^5$ /well) were plated in DMEM/0.5%FBS in the upper chamber of 5  $\mu$ m pore (24-well) transwells (Costar, High Wycombe, UK) and incubated alone or with 2 ng/ml TGF $\beta$ 1 in the absence or presence of SB202190. After 16

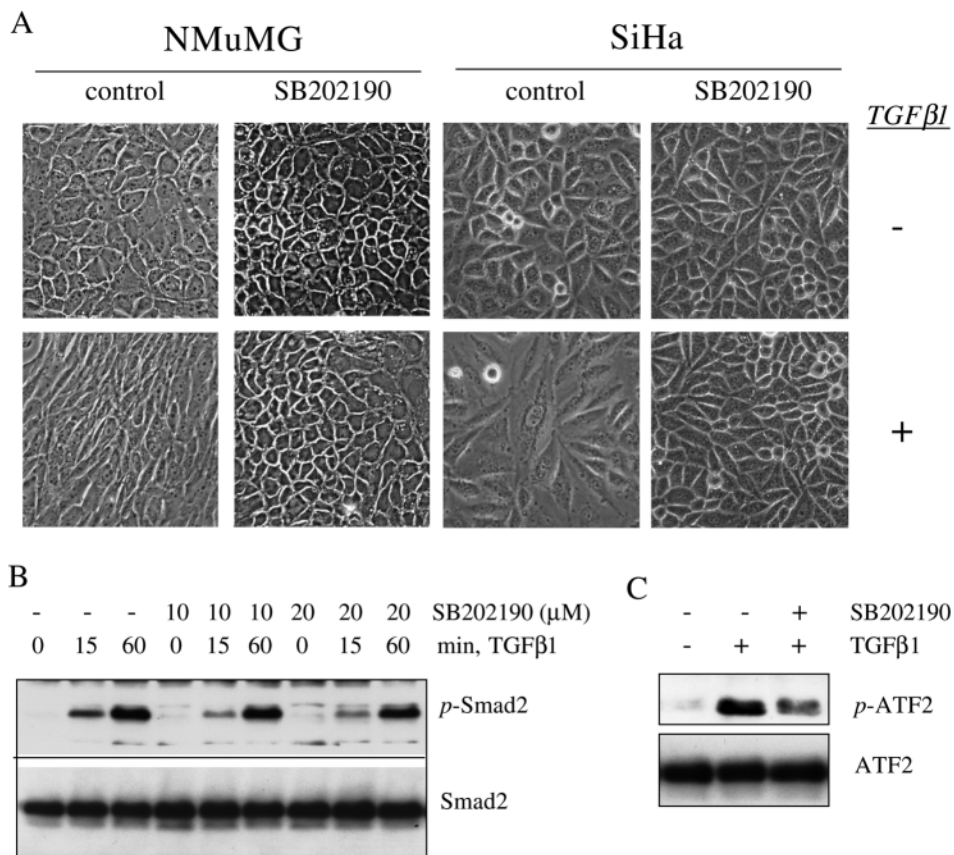

**Fig. 2.** Blockade of TGF $\beta$ -induced EMT by SB202190. (A) NMuMG cells grown on glass coverslips were treated (bottom row) or not (top row) with 2 ng/ml TGF $\beta$ 1 for 24 hours in the absence or presence of 10  $\mu$ M SB202190. Phase contrast images were taken at 200 $\times$  magnification. (B) phospho-Smad2 and total Smad2 immunoblot analysis of whole-cell extracts from cells treated with 2 ng/ml TGF $\beta$ 1 in the absence or presence of SB202190. (C) Immunoblots with antisera to phospho-ATF2 and total ATF2. SB202190 inhibits TGF $\beta$ -induced phosphorylation of ATF2.

hours, cells were fixed in 100% methanol and cells remaining at the top of the polycarbonate membrane were removed with cotton swabs. The cells that had migrated through pores to the lower surface were stained with Diff-quick stain (VWR Scientific). Membranes were mounted on 25 $\times$ 75 mm microslides. Four random images were recorded at 200 $\times$  magnification and cells were counted. Experiments were performed in duplicate.

#### Wound closure assay

MDA-MB-231 and 4T1 cells (1-2 $\times$ 10<sup>5</sup>/well) were seeded in 12-well plates. Cells were incubated in serum-free medium for 32 hours prior to wounding. The wounds were made by scraping with plastic tip across the cell monolayer. Cells were treated with kinase inhibitors 60 minutes before wounding. The wounded cells were treated or untreated with 2 ng/ml TGF $\beta$ 1. Phase contrast images were recorded at the time of wounding (0 hours) and 16 hours thereafter. The wound closure was estimated as the ratio of the remaining wound area relative to the initial wounded area. Experiments were repeated at least three times.

## Results

### H-7 inhibits TGF $\beta$ -mediated activation of p38MAPK and EMT

We investigated TGF $\beta$ -mediated EMT in NMuMG mouse mammary epithelial cells. These mammary epithelial cells have cuboidal cell shape and form tight and adherens junctions. Treatment with 2 ng/ml TGF $\beta$  for 24 hours induced changes in the cell morphology from cuboidal to an elongated spindle-like shape (Fig. 1A). Consistent with previous studies (Miettinen et al., 1994), TGF $\beta$ -mediated EMT was blocked in the presence of 20  $\mu$ M H-7 (Fig. 1A). The inhibitors were added 60 minutes prior to addition of TGF $\beta$  and were present during a complete duration of the experiment. Although H-7 has been introduced as a protein kinase C (PKC) inhibitor, it can inhibit other kinases including PKA and PKG (Quick et al., 1992). Therefore, we investigated the effect of H-7 on the signaling pathways induced by TGF $\beta$ . We found that TGF $\beta$ 1-induced phosphorylation of Smad2 was not affected by the presence of H-7 at the concentration that blocks EMT (Fig. 1C). Inhibition of JNK and ERK1/2 did not affect EMT (Bakin et al., 2000; Bhowmick et al., 2001a). Therefore, we tested whether H-7 affects TGF $\beta$ -mediated activation of the p38MAPK pathway using polyclonal antibodies to phosphorylated (active) MKK3/6 and p38MAPK. TGF $\beta$ -mediated phosphorylation of p38MAPK was blocked in the presence of 20  $\mu$ M H-

7 (Fig. 1C). H-7 also inhibited TGF $\beta$ -induced phosphorylation of ATF2, a substrate of p38MAPK (Fig. 1D).

Next, we checked whether H-7 inhibits activation of MKK3/6. We found that TGF $\beta$ -induced phosphorylation of MKK3/6 was inhibited by H-7 in a dose-dependent manner (Fig. 1E), suggesting that H-7 inhibits a kinase upstream of MKK3/6. This kinase is downstream of TGF $\beta$  receptors as incubation with 5-40  $\mu$ M H-7 did not block phosphorylation of Smad2 (Fig. 1B). Consistent with this result, H-7 did not block TGF $\beta$ -mediated activity of Smad-dependent luciferase reporter (Fig. 1F). Since H-7 can inhibit PKC, we examined activation of p38MAPK in the presence of another PKC

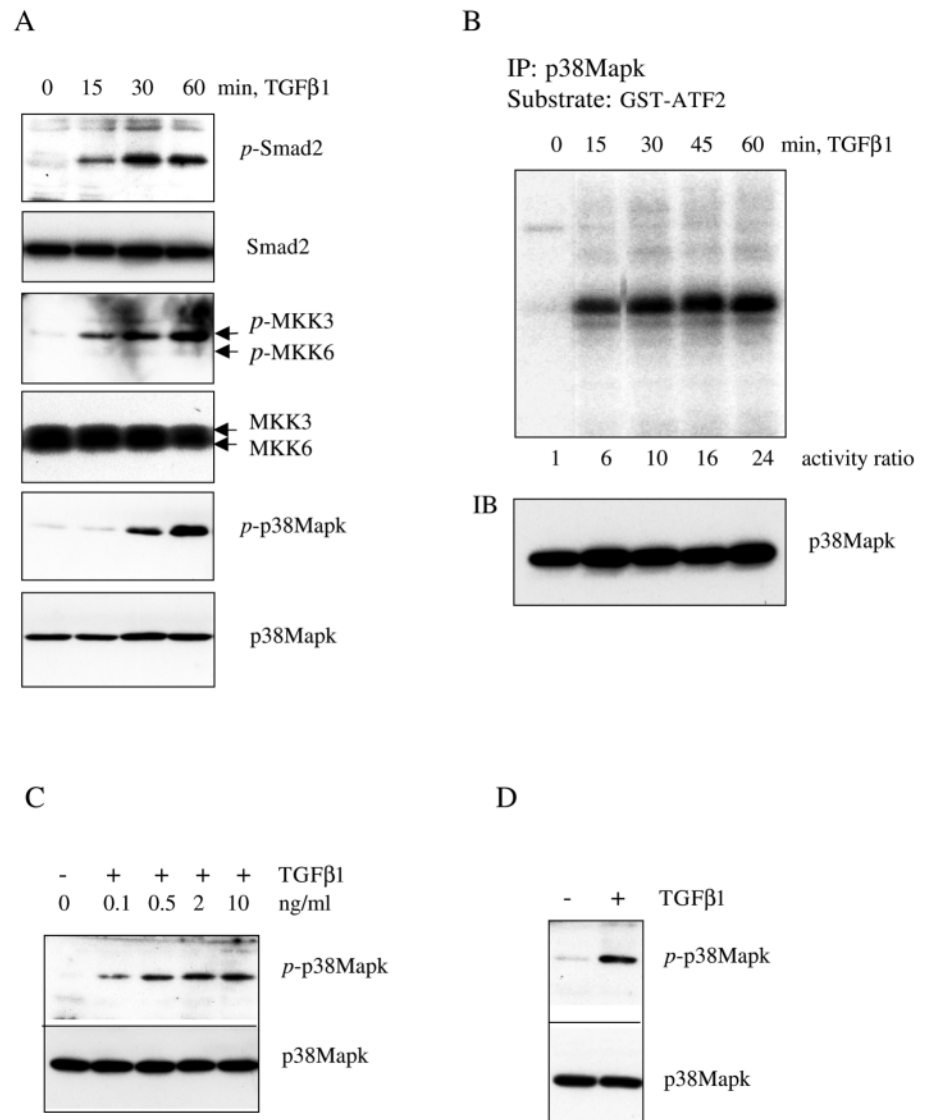

**Fig. 3.** Activation of the p38MAPK pathway in response to TGF $\beta$ . NMuMG cells were incubated in serum-free medium for 4 hours before addition of TGF $\beta$ 1. (A) Immunoblot analyses with antibodies to phospho-Smad2, phospho-MKK3/6 and phospho-p38MAPK, and total Smad2, MKK3/6 and p38MAPK. (B) Detection of p38MAPK kinase activity in whole-cell extracts from NMuMG cells treated with 2 ng/ml TGF $\beta$ 1 using GST-ATF2 as substrate. The products were separated by SDS-PAGE and transferred onto nitrocellulose-membrane.  $\gamma$ -<sup>32</sup>P incorporation into ATF2 was quantitated using PhosphorImager. The membrane was probed with antibody to p38MAPK. (C) Immunoblot detection of TGF $\beta$ 1 dose-dependent effect on p38MAPK phosphorylation at 60 minutes in NMuMG cells. (D) Induction of p38MAPK phosphorylation by 2 ng/ml TGF $\beta$ 1 at 60 minutes in SiHa cells.



inhibitor, bisindolylmaleimide-I (BIM-I) (Davies et al., 2000). Treatment of cells with doses of BIM-I (1-5  $\mu$ M) that block typical PKCs (Davies et al., 2000) did not affect phosphorylation of MKK3/6 in response to TGF $\beta$  (Fig. 1D). These results suggest that H-7 impairs TGF $\beta$  signaling by inhibiting activation of the p38MAPK pathway downstream of TGF $\beta$  receptors, and not through its effect on PKCs.

**p38MAPK is involved in TGF $\beta$ -mediated EMT**

To test whether p38MAPK is involved in EMT, we used specific inhibitors of p38MAPK, SB202190 and SB203580 that do not

affect JNK, MEK1/2 and ERK1/2 (Davies et al., 2000). Microscopic examination showed that cell elongation induced by TGF $\beta$  in NMuMG cells was blocked by co-treatment with 10  $\mu$ M SB202190 (Fig. 2A). Similarly, the p38MAPK inhibitor blocked TGF $\beta$ -induced cell elongation in cervical cancer epithelial SiHa cells (Fig. 2A). Previous studies have shown that these p38MAPK inhibitors may affect the kinase activity of TGF $\beta$  receptors (Eyers et al., 1998). Therefore, we examined their effect on TGF $\beta$ -receptor-dependent phosphorylation of Smad2. Treatment of cells with TGF $\beta$  in the presence of SB202190 did not significantly affect the expression and TGF $\beta$ -induced phosphorylation of Smad2 (Fig. 2B), whereas it

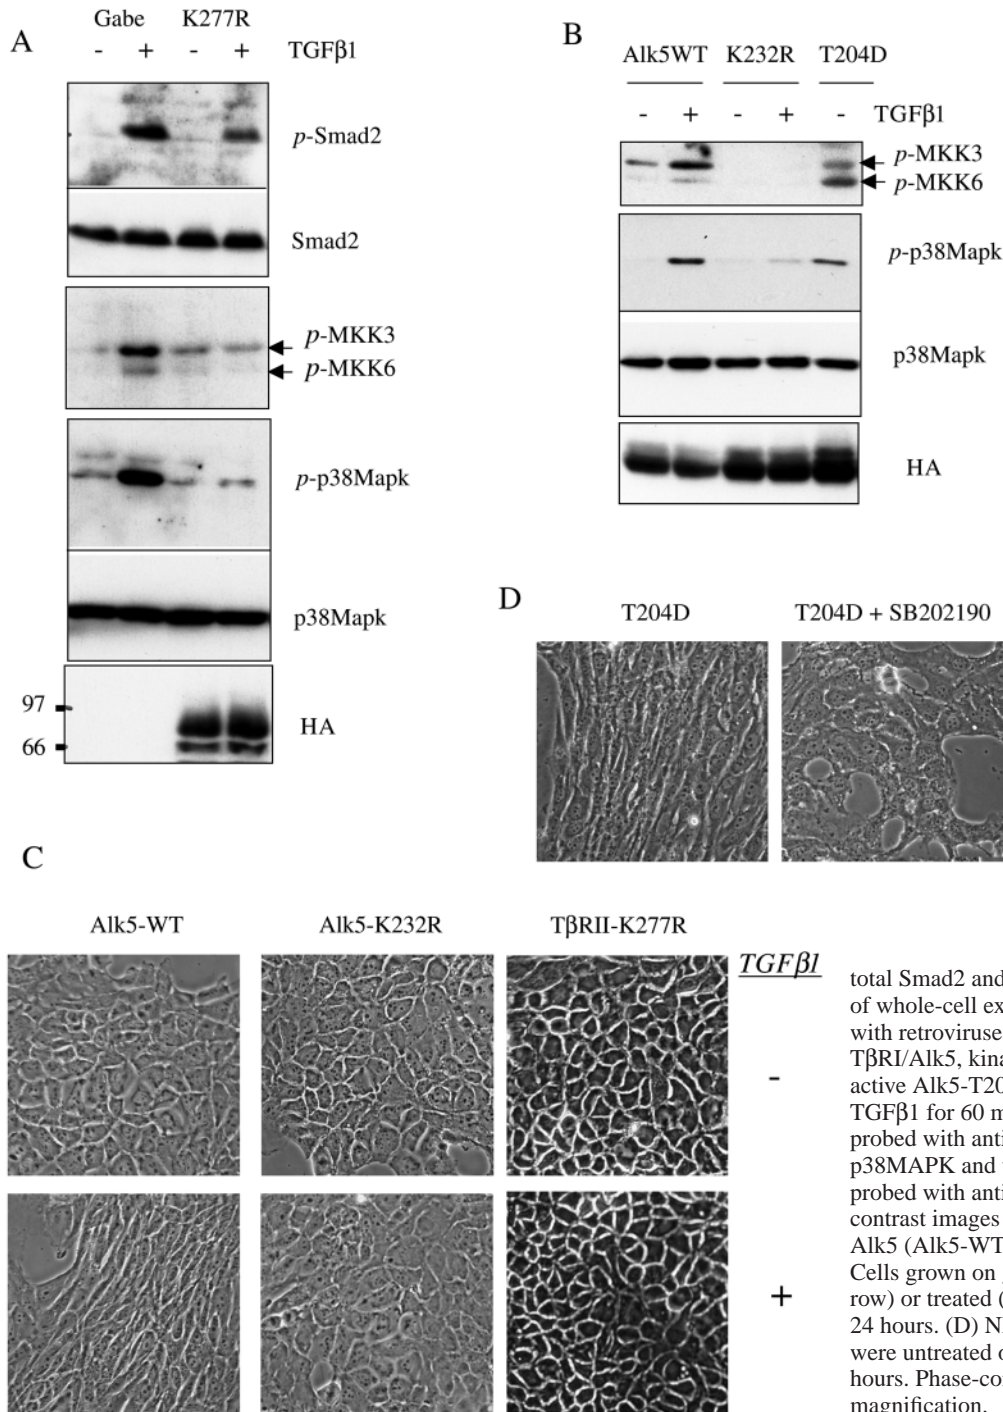

**Fig. 4.** Effect of kinase mutant TGF $\beta$  receptors on TGF $\beta$ -induced EMT and activation of the p38MAPK pathway. (A) Immunoblot analyses of whole-cell extracts from NMuMG cells infected with retrovirus encoding T $\beta$ RII-K277R or control virus (Gabe). Cells were treated with 2 ng/ml TGF $\beta$ 1 for 60 minutes. Expression of HA-tagged T $\beta$ RII-K277R was detected with antisera to the HA-epitope. Dominant-negative T $\beta$ RII-K277R inhibits phosphorylation of Smad2, MKK3/6 and p38MAPK in response to TGF $\beta$ . Membranes were re-probed with antibodies to total Smad2 and p38MAPK. (B) Immunoblot analyses of whole-cell extracts from NMuMG cells infected with retroviruses encoding HA-tagged wild-type (WT) T $\beta$ RI/Alk5, kinase-inactive Alk5-K232R, and kinase-active Alk5-T204D. Cells were treated with 2 ng/ml TGF $\beta$ 1 for 60 minutes, and protein extracts were probed with antibodies to phospho-MKK3/6, phospho-p38MAPK and total p38MAPK. Membranes were re-probed with antisera to the HA-epitope. (C) Phase contrast images of NMuMG cells expressing wild-type Alk5 (Alk5-WT), Alk5-K232R, and T $\beta$ RII-K277R. Cells grown on glass coverslips were untreated (top row) or treated (bottom row) with 2 ng/ml TGF $\beta$ 1 for 24 hours. (D) NMuMG cells expressing Alk5-T204D were untreated or treated with 15  $\mu$ M SB202190 for 24 hours. Phase-contrast images were recorded at 200 $\times$  magnification.

reduced phosphorylation of ATF2 (Fig. 2C). Similar results were obtained with SB203580 (data not shown).

### TGF $\beta$ activates the p38MAPK pathway in NMuMG and SiHa cells

We next examined activation of the p38MAPK pathway in response to TGF $\beta$ . Protein extracts were prepared from cells starved in serum-free medium for 4 hours and treated with TGF $\beta$ 1. Phosphorylation of MKK3/6 was detected after 15 minutes of TGF $\beta$  treatment reaching a maximum at 60 minutes, whereas an increase in p38MAPK phosphorylation at Thr180/Tyr182 was observed at 30 minutes and reached a plateau at 60 minutes (Fig. 3A). To confirm the immunoblot data, we tested p38MAPK-specific activity using an *in vitro* kinase assay with GST-ATF2 fusion protein as substrate. Treatment with TGF $\beta$  increased  $\gamma$ -<sup>32</sup>P incorporation into GST-ATF2 in a time-dependent fashion, sixfold at 15 minutes and reaching a maximal stimulation of 24-fold above control by 60 minutes (Fig. 3B). This increase in p38MAPK kinase activity at 15 minutes may reflect a higher sensitivity of the *in vitro* kinase assay compared with detection of phosphorylated p38MAPK by immunoblot. TGF $\beta$ -induced activation of p38MAPK was dose-dependent with 0.1 ng/ml being sufficient to induce phosphorylation of p38MAPK with a maximal effect observed between 0.5 and 2 ng/ml (Fig. 3C). Treatment of SiHa human cervical carcinoma cells with TGF $\beta$ 1 for 60 minutes resulted in phosphorylation of p38MAPK (Fig. 3D), suggesting activation of p38MAPK signaling in response to TGF $\beta$ 1 in these cells.

### Kinase activities of TGF $\beta$ receptors are required for TGF $\beta$ -induced p38MAPK activation

To confirm the role of TGF $\beta$  receptors in activation of p38MAPK, we engineered cells expressing T $\beta$ RII-K277R, a kinase-inactive mutant of TGF $\beta$  type II receptor (Wrana et al., 1994). NMuMG cells were infected with retrovirus encoding T $\beta$ RII-K277R and enhanced green fluorescent protein (EGFP) or with control retrovirus encoding EGFP only (Gabe). Fluorescent cells were selected by flow cytometry and expression of the HA-tagged mutant receptor was confirmed by immunoblot analysis (Fig. 4A). TGF $\beta$ -mediated phosphorylation of Smad2, MKK3/6, and

p38MAPK was inhibited in T $\beta$ RII-K277R cells compared with control Gabe cells (Fig. 4B). T $\beta$ RII-K277R also blocked EMT (Fig. 4D) and cell migration (Fig. 8A), indicating that T $\beta$ RII kinase activity is required for these TGF $\beta$  responses.

To determine whether the activation of p38MAPK was TGF $\beta$ -specific, we expressed wild-type T $\beta$ RI/Alk5 (Alk5-WT), kinase-inactive Alk5-K232R, or kinase active Alk5-

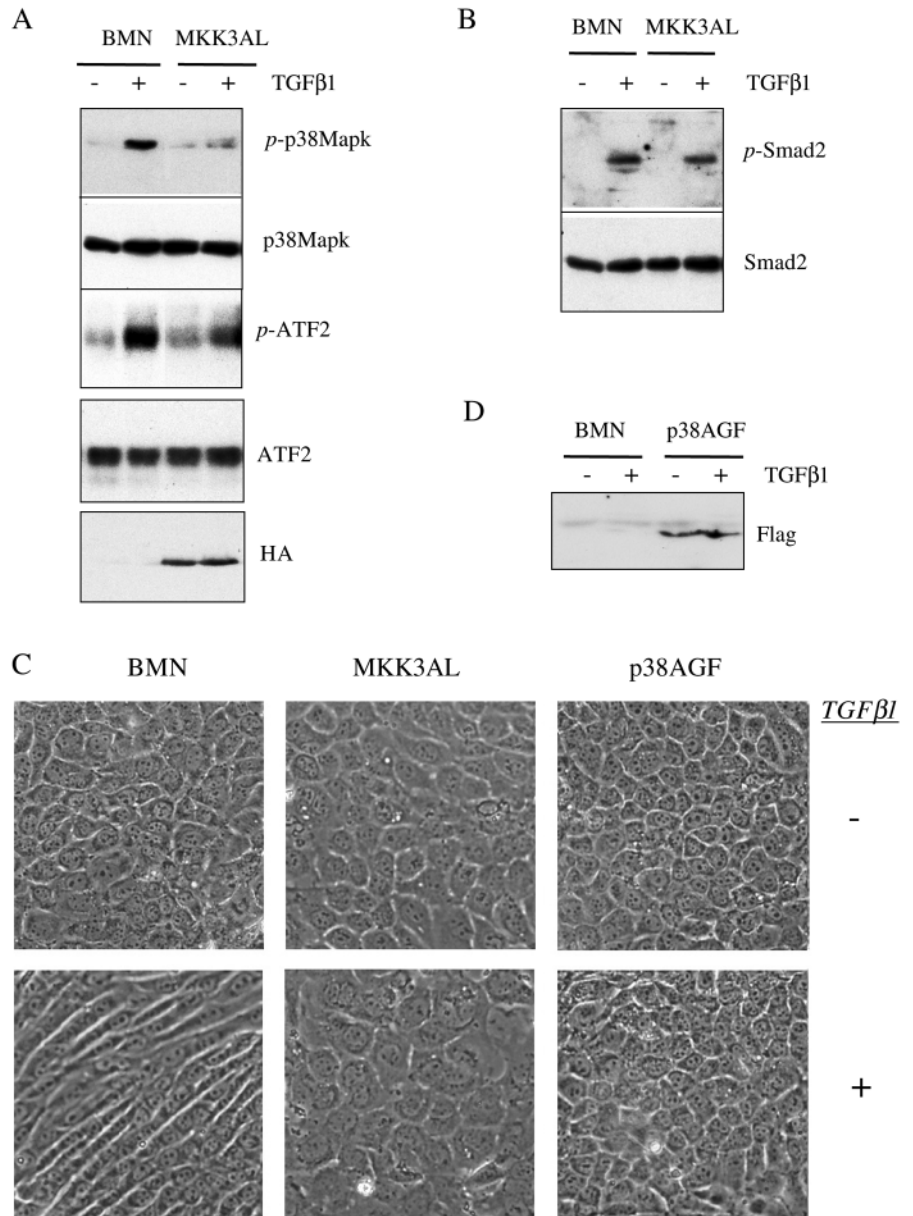

**Fig. 5.** Effect of dominant-negative MKK3AL and p38AGF on TGF $\beta$ -mediated EMT. (A) Immunoblot analysis of p38MAPK and ATF2 phosphorylation in NMuMG cells transfected with empty vector (BMN) or plasmid encoding HA-tagged MKK3AL. Thirty-six hours after transfection cells were treated with 2 ng/ml TGF $\beta$ 1 for 60 minutes. Whole-cell extracts were probed with phospho-specific antisera, and re-probed with antisera to total protein. Expression of MKK3AL was detected with antisera to the HA-epitope. (B) Immunoblot detection of Smad2 phosphorylation in MKK3AL-expressing cells. (C) Phase-contrast images of NMuMG cells infected with control (BMN) retrovirus or retroviruses encoding dominant-negative MKK3 (MKK3AL) or p38 $\alpha$  (p38AGF). Cells were untreated (top row) or treated with 2 ng/ml TGF $\beta$ 1 for 24 hours. Images were recorded at 200 $\times$  magnification. (D) Immunoblot detection of Flag-tagged p38AGF in NMuMG cells infected with p38AGF encoding retrovirus compared with control retrovirus (BMN).



T204D (Kawabata et al., 1995) in NMuMG cells. Alk5 mutants were expressed using a bi-cistronic retroviral vector encoding EGFP. GFP-positive cells were selected by flow cytometry and expression of mutants was confirmed by immunoblot analysis (Fig. 4B). Kinase-inactive Alk5-K232R significantly reduced TGF $\beta$ -induced phosphorylation of MKK3/6 and p38MAPK, whereas kinase active Alk5-T204D induced phosphorylation of MKK3/6 and p38MAPK in the absence of added ligand (Fig. 4B). Microscopic studies showed that TGF $\beta$ -induced EMT was impaired in cells expressing kinase-inactive Alk5-K232R. Cells expressing Alk5-T204D exhibited a fibroblastic morphology similar to Alk5-WT cells treated with TGF $\beta$  for 24 hours (Fig. 4C). Treatment of cells expressing Alk5-T204D with the p38MAPK inhibitor SB202190 reversed these morphological changes.

### MKK3/6 kinases mediate activation of p38MAPK and EMT in response to TGF $\beta$

Dual-specificity MKK3 and MKK6 kinases have been implicated in activation of p38MAPK (Raingeaud et al., 1996). Phosphorylation of both kinases is induced by TGF $\beta$  or by expression of active Alk5-T204D in NMuMG cells (Fig. 4B). Therefore, we tested the effect of dominant-negative MKK3AL (Huang et al., 1997; Zanke et al., 1996) on TGF $\beta$ -mediated activation of p38MAPK and EMT in NMuMG cells. Expression of HA-tagged MKK3AL reduced phosphorylation of endogenous p38MAPK and ATF2 (Fig. 5A), whereas expression and phosphorylation of Smad2 were not affected (Fig. 5B). Similar results were obtained with dominant-negative MKK6AL (data not shown). Next, we examined the effect of MKK3AL on EMT. TGF $\beta$  induced EMT in NMuMG cells infected with control retrovirus encoding EGFP only (BMN), whereas EMT was inhibited in MKK3AL-expressing cells (Fig. 5C). SB202190, a p38MAPK inhibitor, blocks activity of p38 $\alpha$  and p38 $\beta$  but does not inhibit p38 $\gamma$  and p38 $\delta$  (Davies et al., 2000). Since, SB202190 blocked EMT (Fig. 2A), we tested the effect of p38AGF, a dominant-negative mutant of p38 $\alpha$ , on TGF $\beta$ -mediated EMT. TGF $\beta$ -induced morphological transformation in NMuMG infected with retroviruses encoding p38AGF was impaired compared with

cells infected with control BMN virus (Fig. 5C). These findings suggest that MKK3/6 kinases mediate TGF $\beta$ -induced activation of p38MAPK and EMT in NMuMG cells.

### p38MAPK is involved in TGF $\beta$ -induced reorganization of the actin cytoskeleton

We characterized the effect of p38MAPK inhibitors on reorganization of the actin cytoskeleton in response to TGF $\beta$ . Microscopic examination of F-actin by staining with phalloidin-fluorescein showed a cortical arrangement of actin at the cell-cell junctions without significant stress fibers (Fig. 6A). Treatment with TGF $\beta$ 1 for 24 hours induced formation of actin stress fibers arranged along the largest cell axis. SB202190 did not significantly change the actin organization in TGF $\beta$ -untreated cells, but impaired TGF $\beta$ -induced formation of actin stress fibers (Fig. 6A). Similar blockade of stress fiber formation was observed in cells pretreated with H-7 (data not shown). Examination of the actin cytoskeleton in MKK3AL cells showed that MKK3AL did not affect the cortical arrangement of actin in untreated cells, but inhibited TGF $\beta$ -induced actin stress fiber formation (Fig. 6B). These

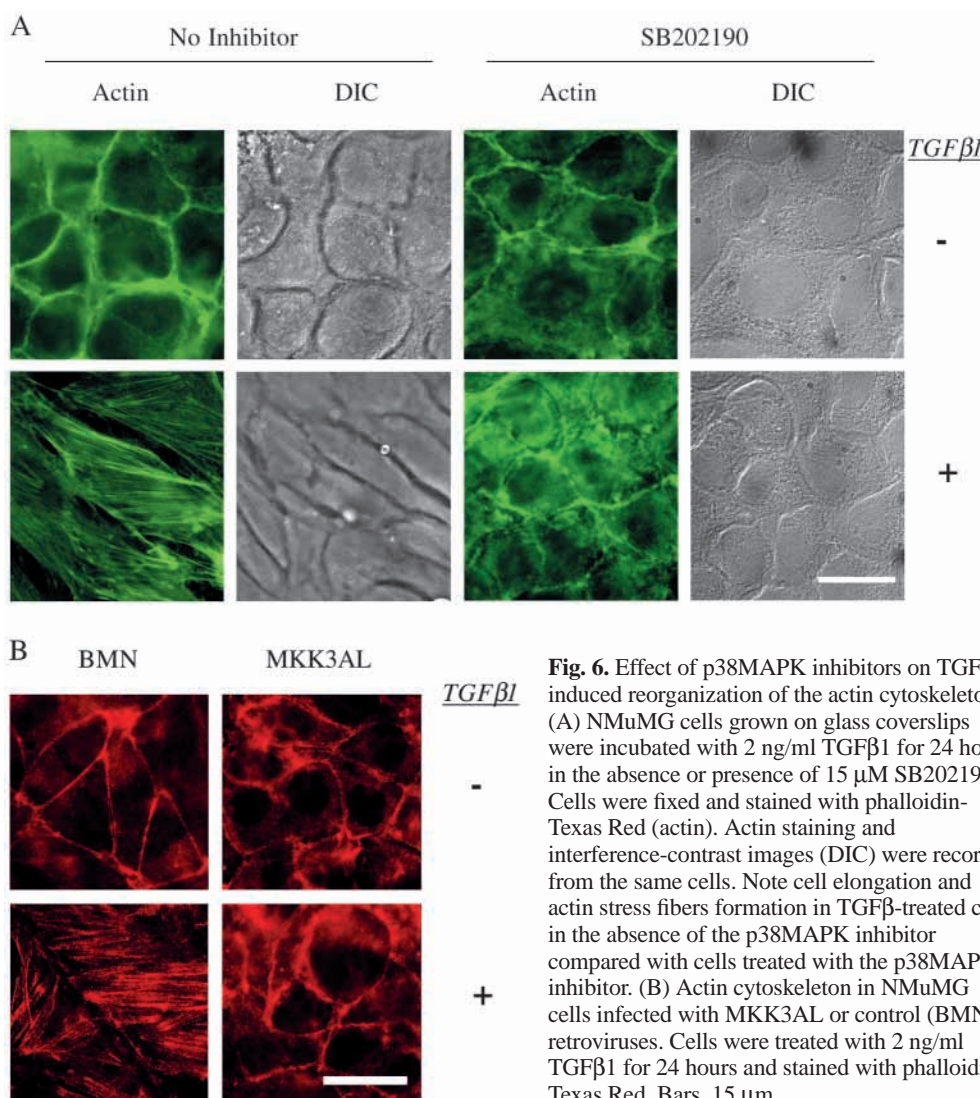

**Fig. 6.** Effect of p38MAPK inhibitors on TGF $\beta$ -induced reorganization of the actin cytoskeleton. (A) NMuMG cells grown on glass coverslips were incubated with 2 ng/ml TGF $\beta$ 1 for 24 hours in the absence or presence of 15  $\mu$ M SB202190. Cells were fixed and stained with phalloidin-Texas Red (actin). Actin staining and interference-contrast images (DIC) were recorded from the same cells. Note cell elongation and actin stress fibers formation in TGF $\beta$ -treated cells in the absence of the p38MAPK inhibitor compared with cells treated with the p38MAPK inhibitor. (B) Actin cytoskeleton in NMuMG cells infected with MKK3AL or control (BMN) retroviruses. Cells were treated with 2 ng/ml TGF $\beta$ 1 for 24 hours and stained with phalloidin-Texas Red. Bars, 15  $\mu$ m.



data suggest that p38MAPK contributes to the reorganization of the actin cytoskeleton induced by TGFβ during EMT.

**Rac GTP-binding protein is involved in TGFβ-induced activation of p38MAPK and EMT**

There is evidence that small GTP-binding proteins are involved in TGFβ signaling (Atfi et al., 1997; Bakin et al., 2000; Bhowmick et al., 2001a; Engel et al., 1999; Mucsi et al., 1996). Rac1 and CDC42 have been implicated in the activation of the MKK3/6-p38MAPK cascade in several systems (Coghlan et al., 2000; Tibbles et al., 1996; Uddin et al., 2000; Zhang et al., 1995). To test whether Rac1 or RhoA are involved in p38MAPK activation in response to TGFβ, we transfected dominant-negative RhoAN19 or Rac1N17 in NMuMG cells. Rac1N17 inhibited TGFβ1-induced phosphorylation of p38MAPK and its downstream substrate ATF2, whereas neither dominant-negative RhoAN19 nor constitutively active RhoAQ63L did not affect p38MAPK phosphorylation (Fig.

7A,B). These data suggest that Rac1 mediates p38MAPK activation in response to TGFβ.

To examine whether Rac1 activity is induced by TGFβ, we performed affinity precipitation assays using a fusion protein of the GTPase-binding domain (amino acids 67-152) from human PAK1 (PBD) and GST. The GST-PBD fusion protein has been shown to specifically bind active Rac1 loaded with GTP (Benard et al., 1999). Treatment of NMuMG cells for 15 minutes with TGFβ resulted in the increase in Rac1 binding to purified GST-PBD (Fig. 7C). GST-PBD effectively interacted with the active GTPγS-bound form of Rac1 but did not bind to the inactive GDP-bound form of Rac1 (Fig. 7C, left inset). To confirm that TGFβ receptors can mediate activation of Rac1, we expressed mutants of Alk5-TβRI in HEK293T cells. Kinase-inactive Alk5K232R reduced the level of active Rac1, whereas kinase-active Alk5T204D increased the amount of Rac1 bound to GST-PBD. Expression of dominant-negative Rac1N17 reduced the amount of Rac1 recovered from GST-PBD beads (Fig. 7D). Since active Rac1

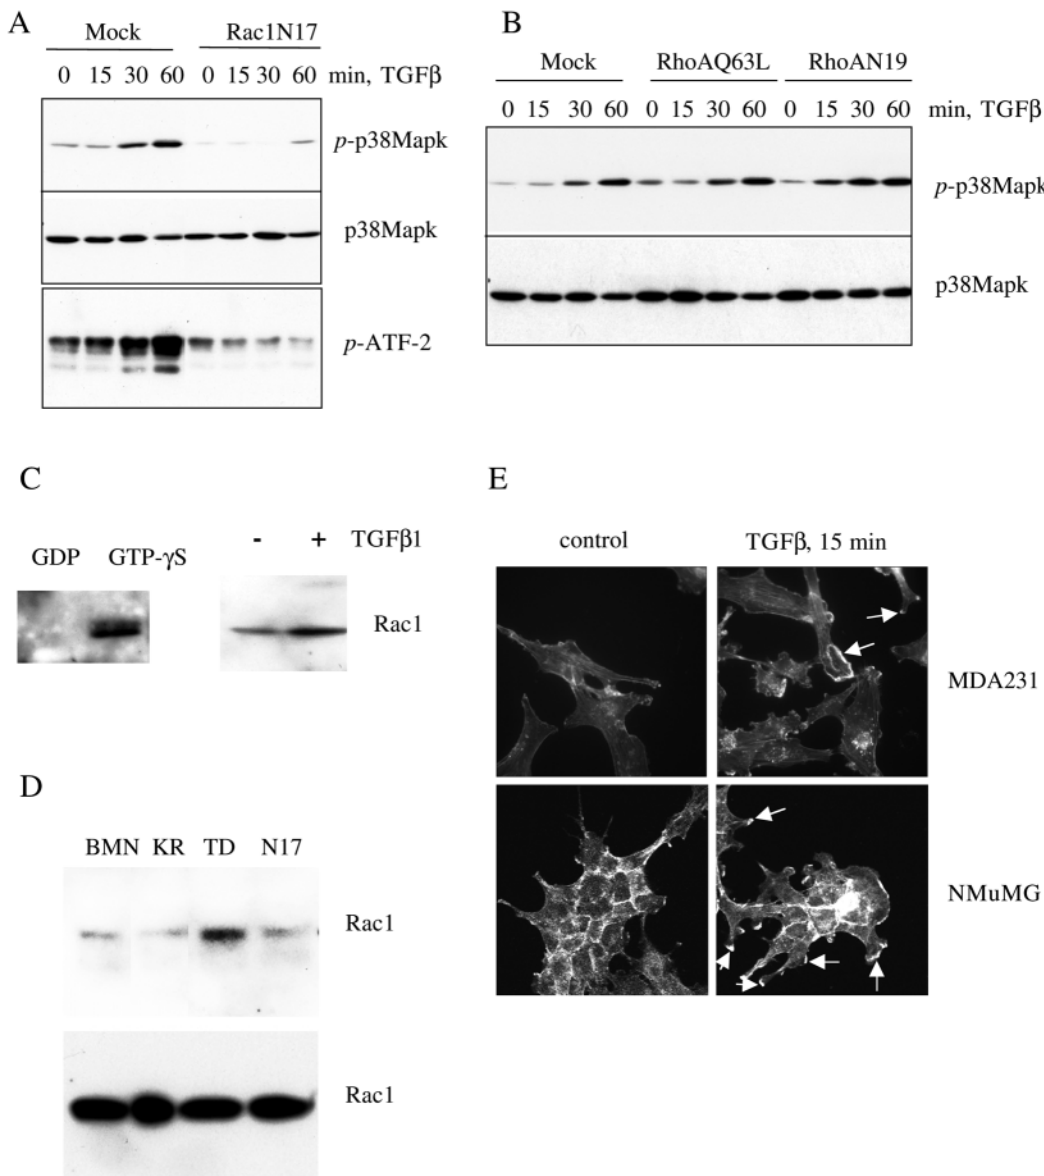

**Fig. 7.** Rac1 is involved in TGFβ-mediated activation of p38MAPK. (A) Immunoblot analysis of p38MAPK and ATF2 phosphorylation in cells expressing Rac1N17 and treated with 2 ng/ml TGFβ1. (B) p38MAPK phosphorylation in cells expressing RhoAN19 or RhoAQ63L. (C) NMuMG cells were treated with 2 ng/ml TGFβ1 for 15 minutes. Cell lysates were clarified and used for affinity precipitation with 8 μg of GST-PBD. Proteins bound to GST-PBD were separated on SDS-PAGE, transferred to nitrocellulose membrane and blotted with antibody to Rac1. The inset at the top-left shows the total signal detected using cell lysate pre-exchanged with either GTPγS or GDP as described in Materials and Methods. (D) 293T cells were transfected with control plasmid (BMN), kinase-inactive Alk5K232R, kinase-active Alk5T204D or dominant-negative Rac1N17. Cells were lysed 48 hours after transfection. Cell lysates were clarified and used for affinity precipitation with 8 μg of GST-PBD as described above. The bottom inset shows the Rac1 signal detected in total cell lysates. (E) Confocal images of F-actin in NMuMG cells treated with 2 ng/ml TGFβ1 for 15 minutes and stained with phalloidin-Texas Red. Arrows indicate the spots of actin polymerization at the cell edges.

mediates actin ruffling and lamellipodia formation (Hall, 1998), we examined F-actin in NMuMG and MDA-MB-231 cells treated with 2 ng/ml of TGF $\beta$ 1 for 15 minutes. Confocal microscopy of cells stained with phalloidin-Texas Red showed that TGF $\beta$  induced actin ruffles, a phenotype associated with active Rac (Fig. 7E).

In order to examine the role of Rac1 in EMT, NMuMG cells were infected with a retrovirus encoding dominant-negative Rac1N17 and Green Fluorescent Protein (GFP). Immunoblot analysis showed at least twofold higher levels of Rac1 in cells infected with Rac1N17 retrovirus compared with cells infected with control BMN virus encoding GFP only (Fig. 8A). TGF $\beta$  induced phosphorylation of MKK3/6 and p38MAPK in cells infected with control retrovirus whereas, in Rac1N17 cells, this induction was significantly reduced (Fig. 8B). Rac1N17 did not significantly affect TGF $\beta$ -dependent phosphorylation of Smad2 (Fig. 8C). Microscopic examination showed that TGF $\beta$ 1 induced cell elongation and the formation of actin stress fibers in control BMN cells, whereas these effects were impaired in cells expressing Rac1N17 (Fig. 8D). These findings suggest that Rac1 is involved in TGF $\beta$ -induced EMT and activation of p38MAPK.

**p38MAPK inhibitors block TGF $\beta$ -mediated cell motility**  
TGF $\beta$  stimulates chemotaxis and migration of tumor and nontumor cells (Ashcroft et al., 1999; Postlethwaite et al., 1987). Recent studies implicated p38MAPK in TGF $\beta$ -induced chemotaxis of human neutrophils (Hannigan et al., 1998). We next tested the effect of p38MAPK inhibitors on TGF $\beta$ -mediated migration of NMuMG (nontumor) and MDA-MB-231 (tumor) cells. TGF $\beta$  stimulated approximately threefold the chemotactic migration of NMuMG cells through polycarbonate filters (Fig. 9A). Migration of NMuMG cells was significantly inhibited by SB202190, as were NMuMG cells infected with kinase-inactive TGF $\beta$  type II receptor (T $\beta$ RII-K277R) compared with those infected with control Gabe retrovirus (Fig. 9A). TGF $\beta$  stimulated approximately sixfold migration of breast cancer MDA-MB-231 cells. This was also blocked by SB202190 (Fig. 9B).

To investigate further the role of p38MAPK in TGF $\beta$ -mediated cell migration, wounds were made in confluent cultures of MDA-MB-231 and 4T1 breast cancer cells. These cells are not growth inhibited by TGF $\beta$ 1. Addition of TGF $\beta$ 1 to serum-free medium accelerated the wound closure in both cell lines, whereas in the presence of the p38MAPK inhibitor

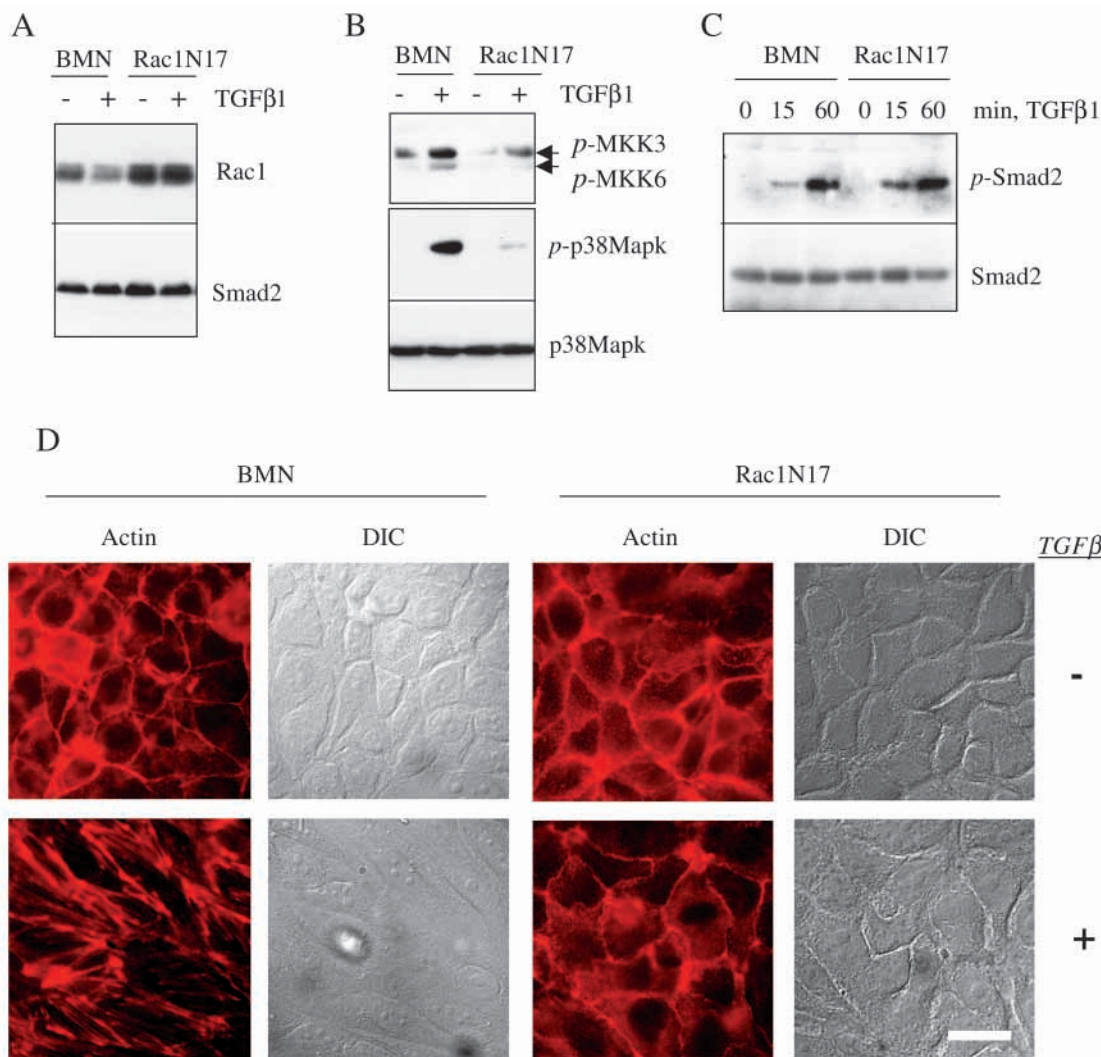

**Fig. 8.** Dominant-negative Rac1N17 blocks TGF $\beta$ -mediated activation of p38MAPK and EMT. NMuMG cells were infected with retrovirus encoding Rac1N17 or control virus (BMN) and treated with 2 ng/ml TGF $\beta$ 1. (A) Detection of Rac1N17 expression with antisera to Rac1. Cells infected with Rac1N17 show a higher level of Rac1 expression. (B) Immunoblot detection of MKK3/6 and p38MAPK phosphorylation in control (BMN) and Rac1N17 expressing cells. (C) Immunoblot with antisera to phospho-Smad2 and total Smad2. (D) Microscopic images from NMuMG cells infected with control retrovirus (BMN) or retrovirus encoding Rac1N17. Cells grown on glass coverslips were treated with 2 ng/ml TGF $\beta$ 1 for 24 hours. Cells were stained with phalloidin-Texas Red (actin). Actin and interference-contrast images (DIC) were recorded from the same cells. Bar, 15  $\mu$ m.



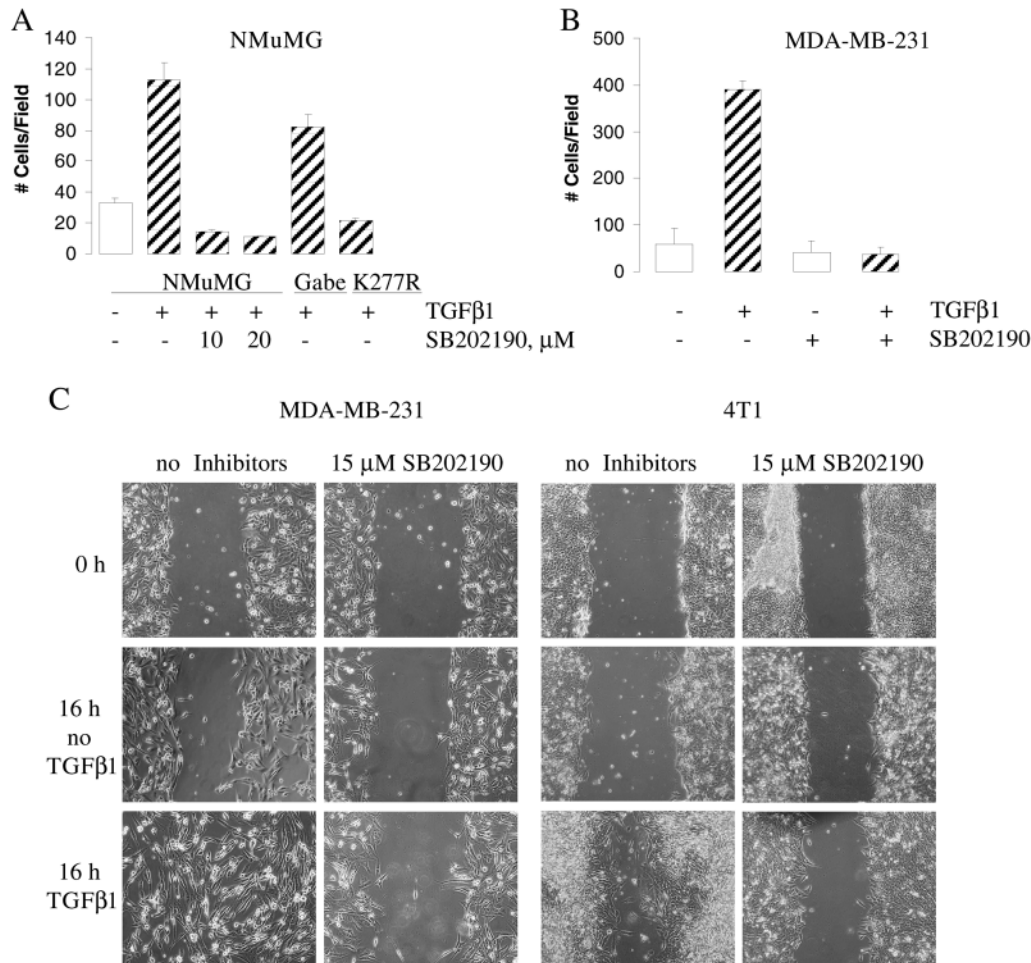

**Fig. 9.** Involvement of p38MAPK in TGF $\beta$ -mediated cell migration. (A,B) NMuMG or MDA-MB-231 cells ( $1 \times 10^5$ /well) were seeded in the upper chamber of 5  $\mu$ m pore transwells and 2 ng/ml TGF $\beta$ 1 was added to the lower chamber. Cells were incubated for 16 hours in the absence or presence of SB202190, a p38MAPK inhibitor. Cells migrating through pores were stained and counted from four random fields. Experiments were performed in duplicates. Values are the mean  $\pm$  s.d. of cells per field. Migration of NMuMG cells expressing kinase-inactive T $\beta$ RII-K277R was compared with cells infected with control Gabe virus. (B) Blockade of MDA-MB-231 cell migration with 10  $\mu$ M SB202190. (C) Wound closure in monolayers of MDA-MB-231 and 4T1 cells following 16 hours of treatment with 2 ng/ml TGF $\beta$ 1 in the absence or presence of 10  $\mu$ M SB202190. Phase contrast images were recorded at 100 $\times$  magnification. Similar results were obtained three times.

the wounds stayed opened (Fig. 9D). These data suggest that p38MAPK is involved in TGF $\beta$ -induced cell migration.

## Discussion

TGF $\beta$  can induce mesenchymal transdifferentiation in epithelial and endothelial cells (Boyer et al., 1999; Brown et al., 1999; Miettinen et al., 1994). Early studies have shown that protein kinase inhibitor H-7 blocks TGF $\beta$ -induced EMT but a particular signaling cascade affected by H-7 was not identified (Miettinen et al., 1994). We found that H-7 inhibited TGF $\beta$ -induced phosphorylation of MKK3/6 kinases, but did not affect phosphorylation of Smad2 and Smad-dependent transcriptional responses. These results suggest that H-7 affects a kinase that mediates signaling downstream of TGF $\beta$  receptors, but upstream of MKK3/6 kinases. This kinase is distinct from typical PKCs, since BIM-I, an inhibitor of typical PKCs, did not block TGF $\beta$ -induced EMT and phosphorylation of MKK3/6 and p38MAPK. The candidate kinases include atypical PKCs and kinase(s) implicated in activation of MKK3/6 such as PAK1 (Zhang et al., 1995), TAK1 (Yamaguchi et al., 1995), and MLK3 (Tibbles et al., 1996).

The H-7 studies suggested a critical role for the p38MAPK pathway in EMT. This hypothesis was further tested using the p38MAPK specific inhibitors, SB202190 and SB203580, which do not inhibit JNK, MEK1/2 and ERK1/2 kinases

(Davies et al., 2000). SB202190 and SB203580 blocked TGF $\beta$ -induced cell morphological changes in NMuMG mouse mammary epithelial cells and SiHa human cervical carcinoma cells. The p38MAPK inhibitors blocked TGF $\beta$ -induced phosphorylation of ATF2, a p38MAPK substrate, without effect on Smad2 phosphorylation, implying that under these experimental conditions the blockade of p38MAPK did not affect TGF $\beta$  receptor kinase activity.

To test whether activation of p38MAPK by TGF $\beta$  is a direct event, we investigated the kinetics of activating phosphorylation of MKK3/6 and p38MAPK. TGF $\beta$  induced phosphorylation of Smad2 and MKK3/6 kinases with similar kinetics (15 minutes). Phosphorylation of p38MAPK was delayed (30 minutes) suggesting that this event requires activation of MKK3/6. We further showed that dominant-negative mutants of MKK3 and MKK6 interfering with p38MAPK activation (Raugeaud et al., 1996) impaired TGF $\beta$ -induced phosphorylation of p38MAPK and ATF2, indicating that the MKK3/6-p38MAPK module mediates TGF $\beta$  signaling in NMuMG cells. The dose-dependent increase in p38MAPK activity was confirmed by *in vitro* kinase assay and by phosphorylation of ATF2.

To confirm the specificity of TGF $\beta$  signaling to p38MAPK we performed studies with TGF $\beta$  receptor mutants. Kinase-inactive type II receptor blocked EMT and phosphorylation of Smad2 as well as MKK3/6 and p38MAPK, indicating that

kinase function of T $\beta$ R11 is required for activation of p38MAPK and EMT. Kinase-inactive T $\beta$ R1/Alk5-K232R also blocked TGF $\beta$ -induced activation of the p38MAPK pathway, whereas expression of kinase active Alk5-T204D resulted in phosphorylation of MKK3/6 and p38MAPK and EMT in the absence of added TGF $\beta$ 1. Thus, kinase activities of both TGF $\beta$  receptors are required for TGF $\beta$ -induced activation of the p38MAPK pathway, and Alk5-T204D can signal to p38MAPK in the absence of added ligand. Alk5-T204D-induced EMT was inhibited by SB202190, a p38MAPK inhibitor, suggesting that p38MAPK mediates EMT induced by Alk5-T204D.

Activation of p38MAPK is mediated by Rac1/CDC42 GTP-binding proteins (Coghlan et al., 2000; Tibbles et al., 1996; Uddin et al., 2000; Zhang et al., 1995). Small GTP-binding proteins are also involved in TGF $\beta$  responses (Atfi et al., 1997; Bakin et al., 2000; Bhowmick et al., 2001a; Engel et al., 1999; Mucsi et al., 1996). We found that dominant-negative Rac1N17 impaired activation of the p38MAPK pathway in NMuMG cells, whereas RhoAN19 did not block this event. Expression of Rac1N17 did not affect phosphorylation of Smad2. These data suggest that Rac1 mediates TGF $\beta$ -induced p38MAPK activation independently of Smad activation. The mechanism of downstream signaling events is unclear. Previous studies showed that PAK1 mediates p38MAPK activation downstream of Rac1 and CDC42 (Zhang et al., 1995). Furthermore, TGF $\beta$ -activated kinase 1 (TAK1), has been implicated in p38MAPK activation in response to BMP and TGF $\beta$  in several cell systems (Yamaguchi et al., 1995).

Expression of dominant-negative Rac1N17 in NMuMG cells inhibited TGF $\beta$ 1-induced changes in cell shape and the actin cytoskeleton suggesting involvement of Rac1 in TGF $\beta$ -induced EMT. This result is consistent with other reports. For example, both D-Rac and D-p38 have been reported to contribute to Dpp signaling during wing morphogenesis in *Drosophila* (Adachi-Yamada et al., 1999; Eaton et al., 1995). There is also evidence that Rac1 is required for EMT induced by hepatocyte growth factor (HGF) in MDCK cells (Ridley et al., 1995; Royal et al., 2000). Dominant-negative Rac/CDC42 mutants inhibit oncogenic Ras-induced cell transformation (Qiu et al., 1997; Qiu et al., 1995), and Ras has been shown to cooperate with TGF $\beta$  in the induction of EMT (Oft et al., 1996). In addition, Rho/Rac/CDC42 proteins are involved in morphogenesis by regulating the actin cytoskeleton (Hall, 1998). Therefore, Rac1 may contribute to TGF $\beta$ -induced EMT via its effects on the cell cytoskeleton and/or via activation of the p38MAPK pathway. In NMuMG cells, TGF $\beta$ 1 induced actin ruffles and activation of Rac1 within 15 minutes (Fig. 7C,E). Expression of kinase-inactive Alk5K232R reduced, whereas constitutively active Alk5-T204D increased, Rac1 loading with GTP (Fig. 7D) and induced the formation of strong actin ruffles (data not shown). These results suggest that Rac activation and actin ruffling induced by TGF $\beta$  may precede the formation of actin stress fibers, which does not occur until 4 hours after addition of TGF $\beta$ 1 (Bhowmick et al., 2001a).

Inhibitors of p38MAPK and dominant-negative MKK3AL impaired TGF $\beta$ -induced changes in cell morphology and reorganization of the actin cytoskeleton. Expression of the dominant-negative mutant of p38 $\alpha$  also blocked TGF $\beta$ -mediated EMT. Together, these results suggest that the p38MAPK pathway contributes to TGF $\beta$ -induced alterations in the actin cytoskeleton and the cell shape during EMT.

Consistent with this hypothesis, p38MAPK has been shown to mediate regulation of the actin cytoskeleton in smooth muscle myocytes in response to TGF $\beta$  (Hedges et al., 1999), and in H<sub>2</sub>O<sub>2</sub>-induced rapid reorganization of the actin cytoskeleton in endothelial and mesenchymal cells (Huot et al., 1998). A recent study reported involvement of p38MAPK in TGF $\beta$ -mediated EMT (Bhowmick et al., 2001b). In this report, adenoviral transduction of dominant-negative p38 $\beta$  inhibited TGF $\beta$ -mediated EMT at the step of disruption of junctional complexes but did not alter actin reorganization. We found that p38MAPK inhibitors and dominant-negative MKK3AL affected actin stress fiber formation (Fig. 6). TGF $\beta$  and Alk5-T204D activated both MKK3 and MKK6 in NMuMG cells (Figs 3, 4). This suggests that TGF $\beta$  may activate multiple p38MAPK isoforms in NMuMG cells as MKK3 preferentially activates p38 $\alpha$  and p38 $\gamma$ , while MKK6 activates p38MAPKs  $\alpha$ ,  $\beta$  and  $\gamma$  (Enslin et al., 1998). Recent studies showed that p38 $\alpha$  and p38 $\beta$  may have different functions (Wang et al., 1998) and different subcellular localization (Lee et al., 2000). p38MAPK inhibitors block activity of both p38 $\alpha$  and p38 $\beta$  (Enslin et al., 1998) and MKK3AL impaired phosphorylation of p38MAPK in NMuMG cells as measured with an antibody that recognizes both  $\alpha$  and  $\beta$  isoforms. Therefore, multiple p38MAPKs may be involved in TGF $\beta$ -induced EMT and mediate different aspects of EMT, potentially explaining the discrepancies with previous studies (Bhowmick et al., 2001b).

EMT is a complex process involving restructuring of the cell cytoskeleton, cell membrane and cell-cell junctions. Previous studies implicated several molecules in different aspects of EMT. Smad transcription factors have been shown to synergize with Alk5 in induction of EMT but no specific function has been associated with these factors (Piek et al., 1999a). PI3K/Akt may contribute to dissolution of tight junctions and to TGF $\beta$  transcriptional responses (Bakin et al., 2000). RhoA/Rock signaling has been implicated in the actin stress fiber formation (Bhowmick et al., 2001a). What aspect of EMT can be mediated by p38MAPK? p38MAPK can regulate the actin organization via HSP27 (Hedges et al., 1999; Huot et al., 1998). Therefore, p38MAPK may function in TGF $\beta$ -induced reorganization of the actin cytoskeleton in parallel or upstream of the RhoA/Rock pathway since dn-RhoA and Y27632, a Rock kinase inhibitor, did not affect activation of p38MAPK by TGF $\beta$  (data not shown). In addition, p38MAPK may contribute to the expression of TGF $\beta$  target genes that are casually involved in EMT because p38MAPK has been implicated in TGF $\beta$ -transcriptional responses by activating ATF2 and Sp1 (Park et al., 2000; Raingeaud et al., 1996; Sano et al., 1999).

Finally, we investigated the role of p38MAPK in TGF $\beta$ -induced migration of mouse and human mammary epithelial cells. The p38MAPK inhibitors blocked TGF $\beta$ -stimulated migration of NMuMG, MDA-MB-231 and 4T1 cells. These results are consistent with the proposed role of p38MAPK in TGF $\beta$ -mediated chemotaxis of human neutrophils (Hannigan et al., 1998) and smooth muscle cells (Hedges et al., 1999). Interestingly, Smad3-deficient keratinocytes and monocytes are impaired in the chemotactic response to TGF $\beta$  (Ashcroft et al., 1999), whereas p38MAPK inhibitors did not affect Smad2 phosphorylation (Fig. 2). These data suggest that the p38MAPK pathway may act in parallel or in cooperation with a Smad-dependent pathway in chemotactic responses to TGF $\beta$ .



The data presented suggest that p38MAPK signaling plays a critical role in TGF $\beta$ -induced EMT and cell migration. This pathway may be considered as a potential target of therapeutic interventions in neoplastic and inflammatory disorders associated with TGF $\beta$ -mediated EMT.

We thank Teresa Dugger and Cathy Allen for excellent technical assistance; Harold Moses, Brian Law and Mark de Caestecker for critical reading of the manuscript; Gary Bokoch, Richard Cerione, Roger Davies, Masahiro Kawabata, Martin Oft, James Woodgett and Jane Burns for expression constructs. This work was supported by PHS grant R01 CA62212, DOD USAMRMC grant DAMD17-98-1-8262 (to C.L.A.), PHS grant R01 CA95263, ACS grant #IRG-58-009-43 (to A.V.B.), and Vanderbilt-Ingram Cancer Center NCI support grant CA68485.

## References

- Adachi-Yamada, T., Nakamura, M., Irie, K., Tomoyasu, Y., Sano, Y., Mori, E., Goto, S., Ueno, N., Nishida, Y. and Matsumoto, K. (1999). p38 MAPK can be involved in TGF beta superfamily signal transduction in Drosophila wing morphogenesis. *Mol. Cell Biol.* **19**, 2322-2329.
- Akhurst, R. J. and Balmain, A. (1999). Genetic events and the role of TGF beta in epithelial tumour progression. *J. Pathol.* **187**, 82-90.
- Ashcroft, G. S., Yang, X., Glick, A. B., Weinstein, M., Letterio, J. L., Mizel, D. E., Anzano, M., Greenwell-Wild, T., Wahl, S. M., Deng, C. et al. (1999). Mice lacking Smad3 show accelerated wound healing and an impaired local inflammatory response. *Nat. Cell Biol.* **1**, 260-266.
- Atfi, A., Djelloul, S., Chastre, E., Davis, R. and Gespach, C. (1997). Evidence for a role of Rho-like GTPases and stress-activated protein kinase/c-Jun N-terminal kinase (SAPK/JNK) in TGF beta-mediated signaling. *J. Biol. Chem.* **272**, 1429-1432.
- Bakin, A. V., Tomlinson, A. K., Bhowmick, N. A., Moses, H. L. and Arteaga, C. L. (2000). Phosphatidylinositol 3-kinase function is required for TGFbeta-mediated epithelial to mesenchymal transition and cell migration. *J. Biol. Chem.* **275**, 36803-36810.
- Barrack, E. R. (1997). TGF beta in prostate cancer: a growth inhibitor that can enhance tumorigenicity. *Prostate* **31**, 61-70.
- Benard, V., Bohl, B. P. and Bokoch, G. M. (1999). Characterization of Rac and Cdc42 activation in chemoattractant-stimulated human neutrophils using a novel assay for active GTPases. *J. Biol. Chem.* **274**, 13198-13204.
- Bhowmick, N. A., Ghiassi, M., Bakin, A., Aakre, M., Lundquist, C. A., Engel, M. E., Arteaga, C. L. and Moses, H. L. (2001a). TGFbeta mediates epithelial to mesenchymal transdifferentiation through a RhoA-dependent mechanism. *Mol. Biol. Cell* **12**, 27-36.
- Bhowmick, N. A., Zent, R., Ghiassi, M., McDonnell, M. and Moses, H. L. (2001b). Integrin beta 1 signaling is necessary for transforming growth factor-beta activation of p38MAPK and epithelial plasticity. *J. Biol. Chem.* **276**, 46707-46713.
- Boyer, A. S., Ayerinkas, I. I., Vincent, E. B., McKinney, L. A., Weeks, D. L. and Runyan, R. B. (1999). TGFbeta2 and TGFbeta3 have separate and sequential activities during epithelial-mesenchymal cell transformation in the embryonic heart. *Dev. Biol.* **208**, 530-545.
- Brown, C. B., Boyer, A. S., Runyan, R. B. and Barnett, J. V. (1999). Requirement of type III TGF-beta receptor for endocardial cell transformation in the heart. *Science* **283**, 2080-2082.
- Coghlan, M. P., Chou, M. M. and Carpenter, C. L. (2000). Atypical protein kinases C lambda and -zeta associate with the GTP-binding protein Cdc42 and mediate stress fiber loss. *Mol. Cell Biol.* **20**, 2880-2889.
- Cui, W., Fowles, D. J., Bryson, S., Duffie, E., Ireland, H., Balmain, A. and Akhurst, R. J. (1996). TGFbeta1 inhibits the formation of benign skin tumors, but enhances progression to invasive spindle carcinomas in transgenic mice. *Cell* **86**, 531-542.
- Davies, S. P., Reddy, H., Caivano, M. and Cohen, P. (2000). Specificity and mechanism of action of some commonly used protein kinase inhibitors. *Biochem. J.* **351**, 95-105.
- de Caestecker, M. P., Piek, E. and Roberts, A. B. (2000). Role of transforming growth factor-beta signaling in cancer. *J. Natl. Cancer Inst.* **92**, 1388-1402.
- Eaton, S., Auvinen, P., Luo, L., Jan, Y. N. and Simons, K. (1995). CDC42 and Rac1 control different actin-dependent processes in the Drosophila wing disc epithelium. *J. Cell Biol.* **131**, 151-164.
- Engel, M. E., McDonnell, M. A., Law, B. K. and Moses, H. L. (1999). Interdependent SMAD and JNK signaling in TGF-beta-mediated transcription. *J. Biol. Chem.* **274**, 37413-37420.
- Enslin, H., Raingeaud, J. and Davis, R. J. (1998). Selective activation of p38 mitogen-activated protein (MAP) kinase isoforms by the MAP kinase kinases MKK3 and MKK6. *J. Biol. Chem.* **273**, 1741-1748.
- Eyers, P. A., Craxton, M., Morrice, N., Cohen, P. and Goedert, M. (1998). Conversion of SB 203580-insensitive MAP kinase family members to drug-sensitive forms by a single amino-acid substitution. *Chem. Biol.* **5**, 321-328.
- Frey, R. S. and Mulder, K. M. (1997). Involvement of ERK 2 and stress-activated protein kinase/JNK activation by TGF-beta in the negative growth control of breast cancer cells. *Cancer Res.* **57**, 628-633.
- Hall, A. (1998). Rho GTPases and the actin cytoskeleton. *Science* **279**, 509-514.
- Hanafusa, H., Ninomiya-Tsuji, J., Masuyama, N., Nishita, M., Fujisawa, J., Shibuya, H., Matsumoto, K. and Nishida, E. (1999). Involvement of the p38 MAPK pathway in TGFbeta-induced gene expression. *J. Biol. Chem.* **274**, 27161-27167.
- Hannigan, M., Zhan, L., Ai, Y. and Huang, C. K. (1998). The role of p38 MAP kinase in TGF-beta1-induced signal transduction in human neutrophils. *Biochem. Biophys. Res. Commun.* **246**, 55-58.
- Hartsough, M. T. and Mulder, K. M. (1995). Transforming growth factor beta activation of p44[IMAGE] in proliferating cultures of epithelial cells. *J. Biol. Chem.* **270**, 7117-7124.
- Hedges, J. C., Dechert, M. A., Yamboliev, I. A., Martin, J. L., Hickey, E., Weber, L. A. and Gerthoffer, W. T. (1999). A role for p38(MAPK)/HSP27 pathway in smooth muscle cell migration. *J. Biol. Chem.* **274**, 24211-24219.
- Hojo, M., Morimoto, T., Maluccio, M., Asano, T., Morimoto, K., Lagman, M., Shimbo, T. and Suthanthiran, M. (1999). Cyclosporine induces cancer progression by a cell-autonomous mechanism. *Nature* **397**, 530-534.
- Huang, S., Jiang, Y., Li, Z., Nishida, E., Mathias, P., Lin, S., Ulevitch, R. J., Nemerow, G. R. and Han, J. (1997). Apoptosis signaling pathway in T cells is composed of ICE/Ced-3 family proteases and MAP kinase kinase 6b. *Immunity* **6**, 739-749.
- Huot, J., Houle, F., Rousseau, S., Deschesnes, R. G., Shah, G. M. and Landry, J. (1998). SAPK2/p38-dependent F-actin reorganization regulates early membrane blebbing during stress-induced apoptosis. *J. Cell Biol.* **143**, 1361-1373.
- Iwasaki, S., Iguchi, M., Watanabe, K., Hoshino, R., Tsujimoto, M. and Kohno, M. (1999). Specific activation of the p38 MAPK signaling pathway and induction of neurite outgrowth in PC12 cells by BMP-2. *J. Biol. Chem.* **274**, 26503-26510.
- Kawabata, M., Imamura, T., Miyazono, K., Engel, M. E. and Moses, H. L. (1995). Interaction of the transforming growth factor-beta type I receptor with farnesyl-protein transferase-alpha. *J. Biol. Chem.* **270**, 29628-29631.
- Kucich, S., Rosenbloom, J. C., Shen, G., Abrams, W. R., Hamilton, A. D., Sehti, S. M. and Rosenbloom, J. (2000). TGF-beta1 stimulation of fibronectin transcription in cultured human lung fibroblasts requires active geranylgeranyl transferase I, phosphatidylcholine-specific phospholipase C, protein kinase C-delta, and p38, but not erk1/erk2. *Arch. Biochem. Biophys.* **374**, 313-324.
- Lee, S. H., Park, J., Che, Y., Han, P. L. and Lee, J. K. (2000). Constitutive activity and differential localization of p38alpha and p38beta MAPKs in adult mouse brain. *J. Neurosci. Res.* **60**, 623-631.
- Massague, J. (1998). TGF-beta signal transduction. *Annu. Rev. Biochem.* **67**, 753-791.
- Miettinen, P. J., Ebner, R., Lopez, A. R. and Derynck, R. (1994). TGF-beta induced transdifferentiation of mammary epithelial cells to mesenchymal cells: involvement of type I receptors. *J. Cell Biol.* **127**, 2021-2036.
- Monzen, K., Shiojima, I., Hiroi, Y., Kudoh, S., Oka, T., Takimoto, E., Hayashi, D., Hosoda, T., Habara-Ohkubo, A., Nakaoka, T. et al. (1999). Bone morphogenetic proteins induce cardiomyocyte differentiation through the mitogen-activated protein kinase kinase TAK1 and cardiac transcription factors Csx/Nkx-2.5 and GATA-4. *Mol. Cell Biol.* **19**, 7096-7105.
- Mucsi, I., Skorecki, K. L. and Goldberg, H. J. (1996). ERK and the small GTP-binding protein, Rac, contribute to the effects of TGF-beta1 on gene expression. *J. Biol. Chem.* **271**, 16567-16572.
- Nakamura, K., Shirai, T., Morishita, S., Uchida, S., Saeki-Miura, K. and Makishima, F. (1999). p38 MAPK functionally contributes to chondrogenesis induced by growth/differentiation factor-5 in ATDC5 cells. *Exp. Cell Res.* **250**, 351-363.

- Oft, M., Heider, K. H. and Beug, H.** (1998). TGFbeta signaling is necessary for carcinoma cell invasiveness and metastasis. *Curr. Biol.* **8**, 1243-1252.
- Oft, M., Peli, J., Rudaz, C., Schwarz, H., Beug, H. and Reichmann, E.** (1996). TGF-beta1 and Ha-Ras collaborate in modulating the phenotypic plasticity and invasiveness of epithelial tumor cells. *Genes Dev.* **10**, 2462-2477.
- Park, I. K., Lyu, M. A., Yeo, S. J., Han, T. H. and Kook, Y. H.** (2000). Sp1 mediates constitutive and transforming growth factor beta-inducible expression of urokinase type plasminogen activator receptor gene in human monocyte-like U937 cells. *Biochim. Biophys. Acta* **1490**, 302-310.
- Piek, E., Heldin, C. H. and ten Dijke, P.** (1999a). Specificity, diversity, and regulation in TGF-beta superfamily signaling. *FASEB J.* **13**, 2105-2124.
- Piek, E., Moustakas, A., Kurisaki, A., Heldin, C. H. and ten Dijke, P.** (1999b). TGF-(beta) type I receptor/ALK-5 and Smad proteins mediate epithelial to mesenchymal transdifferentiation in NMuMG breast epithelial cells. *J. Cell Sci.* **112**, 4557-4568.
- Portella, G., Cumming, S. A., Liddell, J., Cui, W., Ireland, H., Akhurst, R. J. and Balmain, A.** (1998). Transforming growth factor beta is essential for spindle cell conversion of mouse skin carcinoma in vivo: implications for tumor invasion. *Cell Growth Differ.* **9**, 393-404.
- Postlethwaite, A. E., Keski-Oja, J., Moses, H. L. and Kang, A. H.** (1987). Stimulation of the chemotactic migration of human fibroblasts by transforming growth factor beta. *J. Exp. Med.* **165**, 251-256.
- Qiu, R. G., Chen, J., Kirn, D., McCormick, F. and Symons, M.** (1995). An essential role for Rac in Ras transformation. *Nature* **374**, 457-459.
- Qiu, R. G., Abo, A., McCormick, F. and Symons, M.** (1997). Cdc42 regulates anchorage-independent growth and is necessary for Ras transformation. *Mol. Cell. Biol.* **17**, 3449-3458.
- Quick, J., Ware, J. A. and Driedger, P. E.** (1992). The structure and biological activities of the widely used protein kinase inhibitor, H7, differ depending on the commercial source. *Biochem. Biophys. Res. Commun.* **187**, 657-663.
- Raingaud, J., Whitmarsh, A. J., Barrett, T., Derijard, B. and Davis, R. J.** (1996). MKK3- and MKK6-regulated gene expression is mediated by the p38 mitogen-activated protein kinase signal transduction pathway. *Mol. Cell. Biol.* **16**, 1247-1255.
- Ridley, A., Comoglio, P. and Hall, A.** (1995). Regulation of scatter factor/hepatocyte growth factor responses by Ras, Rac, and Rho in MDCK cells. *Mol. Cell. Biol.* **15**, 1110-1122.
- Royal, I., Lamarche-Vane, N., Lamorte, L., Kaibuchi, K. and Park, M.** (2000). Activation of cdc42, rac, PAK, and rho-kinase in response to hepatocyte growth factor differentially regulates epithelial cell colony spreading and dissociation. *Mol. Biol. Cell* **11**, 1709-1725.
- Sano, Y., Harada, J., Tashiro, S., Gotoh-Mandeville, R., Maekawa, T. and Ishii, S.** (1999). ATF-2 is a common nuclear target of Smad and TAK1 pathways in TGF-beta signaling. *J. Biol. Chem.* **274**, 8949-8957.
- Shibuya, H., Iwata, H., Masuyama, N., Gotoh, Y., Yamaguchi, K., Irie, K., Matsumoto, K., Nishida, E. and Ueno, N.** (1998). Role of TAK1 and TAB1 in BMP signaling in early Xenopus development. *EMBO J.* **17**, 1019-1028.
- Tibbles, L. A. and Woodgett, J. R.** (1999). The stress-activated protein kinase pathways. *Cell. Mol. Life Sci.* **55**, 1230-1254.
- Tibbles, L. A., Ing, Y. L., Kiefer, F., Chan, J., Iscove, N., Woodgett, J. R. and Lassam, N. J.** (1996). MLK-3 activates the SAPK/JNK and p38/RK pathways via SEK1 and MKK3/6. *EMBO J.* **15**, 7026-7035.
- Uddin, S., Lekmine, F., Sharma, N., Majchrzak, B., Mayer, I., Young, P. R., Bokoch, G. M., Fish, E. N. and Platanius, L. C.** (2000). The Rac1/p38 mitogen-activated protein kinase pathway is required for interferon alpha-dependent transcriptional activation but not serine phosphorylation of Stat proteins. *J. Biol. Chem.* **275**, 27634-27640.
- Wang, Y., Huang, S., Sah, V. P., Ross, J., Jr, Brown, J. H., Han, J. and Chien, K. R.** (1998). Cardiac muscle cell hypertrophy and apoptosis induced by distinct members of the p38 mitogen-activated protein kinase family. *J. Biol. Chem.* **273**, 2161-2168.
- Wrana, J. L., Attisano, L., Wieser, R., Ventura, F. and Massague, J.** (1994). Mechanism of activation of the TGF-beta receptor. *Nature* **370**, 341-347.
- Yamaguchi, K., Shirakabe, K., Shibuya, H., Irie, K., Oishi, I., Ueno, N., Taniguchi, T., Nishida, E. and Matsumoto, K.** (1995). Identification of a member of the MAPKKK family as a potential mediator of TGF-beta signal transduction. *Science* **270**, 2008-2011.
- Yee, J. K., Miyanojara, A., LaPorte, P., Bouic, K., Burns, J. C. and Friedmann, T.** (1994). A general method for the generation of high-titer, pantropic retroviral vectors: highly efficient infection of primary hepatocytes. *Proc. Natl. Acad. Sci. USA* **91**, 9564-9568.
- Zanke, B. W., Rubie, E. A., Winnett, E., Chan, J., Randall, S., Parsons, M., Boudreau, K., McInnis, M., Yan, M., Templeton, D. J. et al.** (1996). Mammalian mitogen-activated protein kinase pathways are regulated through formation of specific kinase-activator complexes. *J. Biol. Chem.* **271**, 29876-29881.
- Zhang, S., Han, J., Sells, M. A., Chernoff, J., Knaus, U. G., Ulevitch, R. J. and Bokoch, G. M.** (1995). Rho family GTPases regulate p38 MAPK through the downstream mediator Pak1. *J. Biol. Chem.* **270**, 23934-23936.
